# Supplementary material for: Understanding the influence of geometric and electronic structure on the excited state dynamical and photoredox properties of perinone chromophores
Source: Royal Society of Chemistry journal article supplement (doi:10.1039/d1cp03870b), 2021-01-01
Supplement: d1cp03870b1.pdf [file d1cp03870b1.pdf]

# Understanding the Influence of Geometric and Electronic Structure on the Excited State Dynamical and Photoredox Properties of Perinone Chromophores

*Kaylee A. Wells,<sup>a†</sup> Jonathan R. Palmer,<sup>a†</sup> James E. Yarnell,<sup>ab</sup> Sofia Garakyaraghi,<sup>a</sup> Barry C. Pemberton,<sup>ac</sup> Joseph M. Favale,<sup>a</sup> Mary Katharine Valchar,<sup>a</sup> Arnab Chakraborty,<sup>a</sup> and Felix N. Castellano<sup>a\*</sup>*

<sup>a</sup> Department of Chemistry, North Carolina State University, Raleigh, North Carolina 27695-8204, USA.

<sup>b</sup> Department of Chemistry & Chemistry Research Center, United States Air Force Academy, Colorado Springs, Colorado 80840-6230, USA.

<sup>c</sup> School of Natural Sciences and Mathematics, Stockton University, Galloway, 08205, USA.

<sup>†</sup> These authors contributed equally.

# 1. Structural Characterization Data

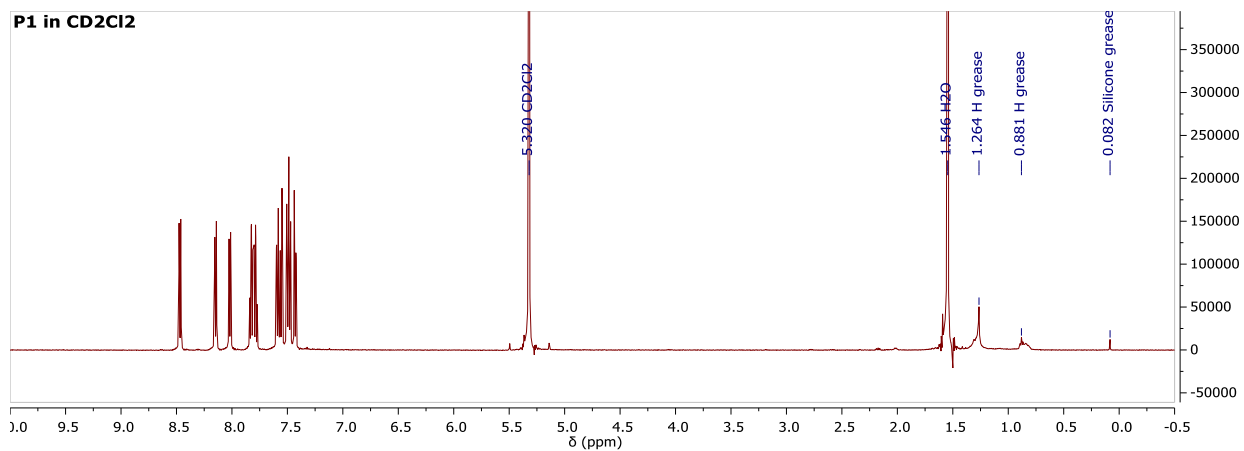

**Figure S1.** <sup>1</sup>H NMR spectrum of **1** in CD<sub>2</sub>Cl<sub>2</sub> (500 MHz).

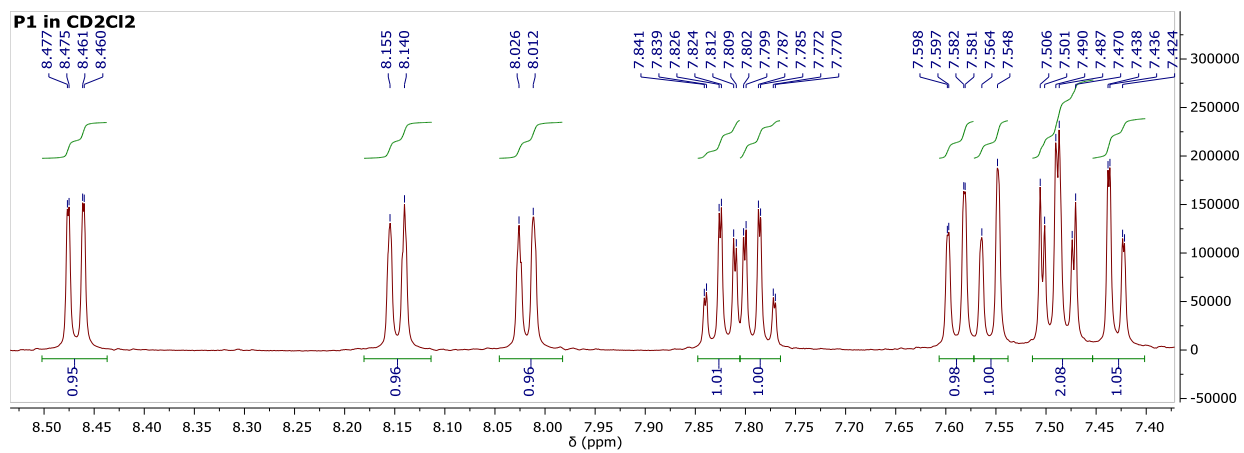

**Figure S2.** <sup>1</sup>H NMR spectrum of **1** (zoomed into aromatic region) in CD<sub>2</sub>Cl<sub>2</sub> (500 MHz).

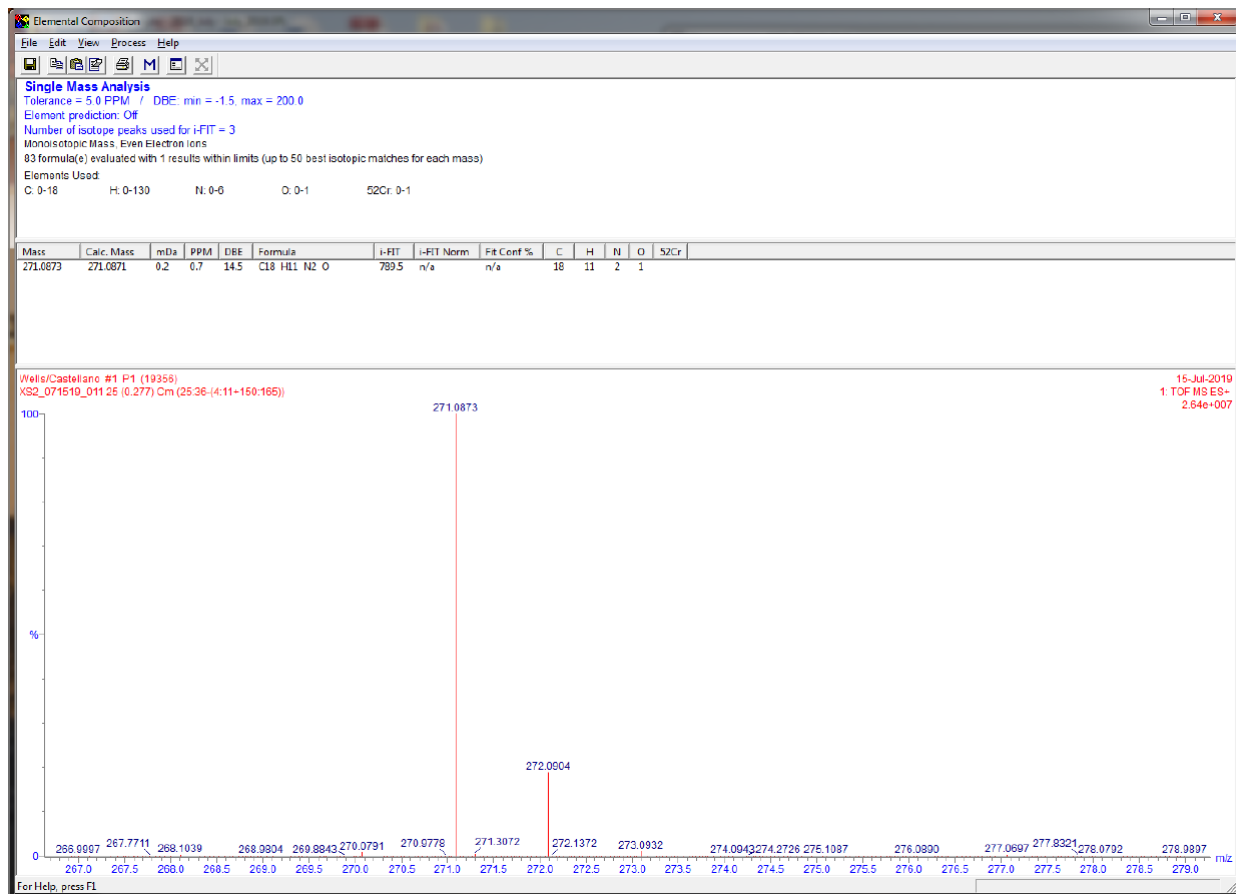

**Figure S3.** High resolution mass spectrum of **1**.

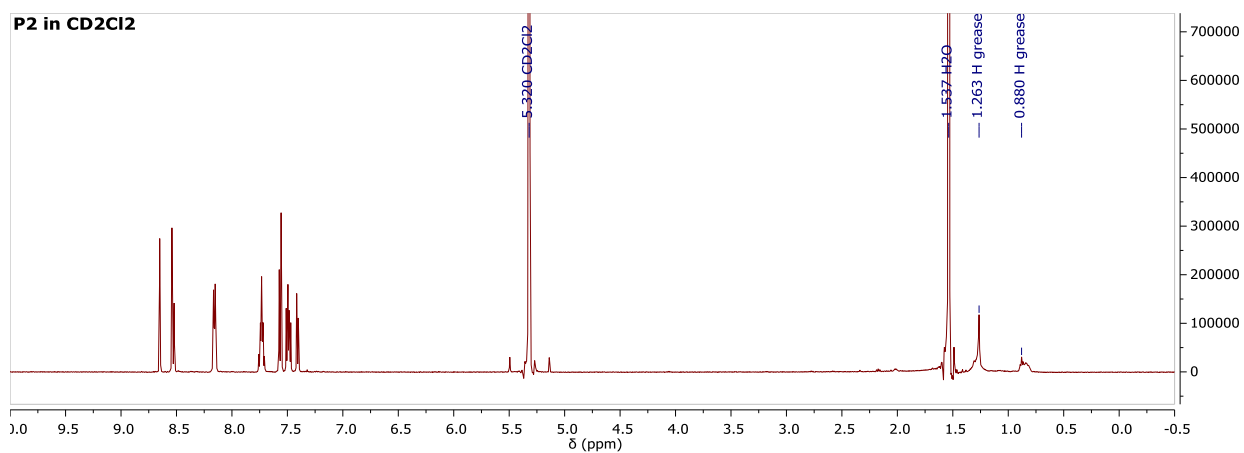

**Figure S4.** <sup>1</sup>H NMR spectrum of **2** in CD<sub>2</sub>Cl<sub>2</sub> (500 MHz).

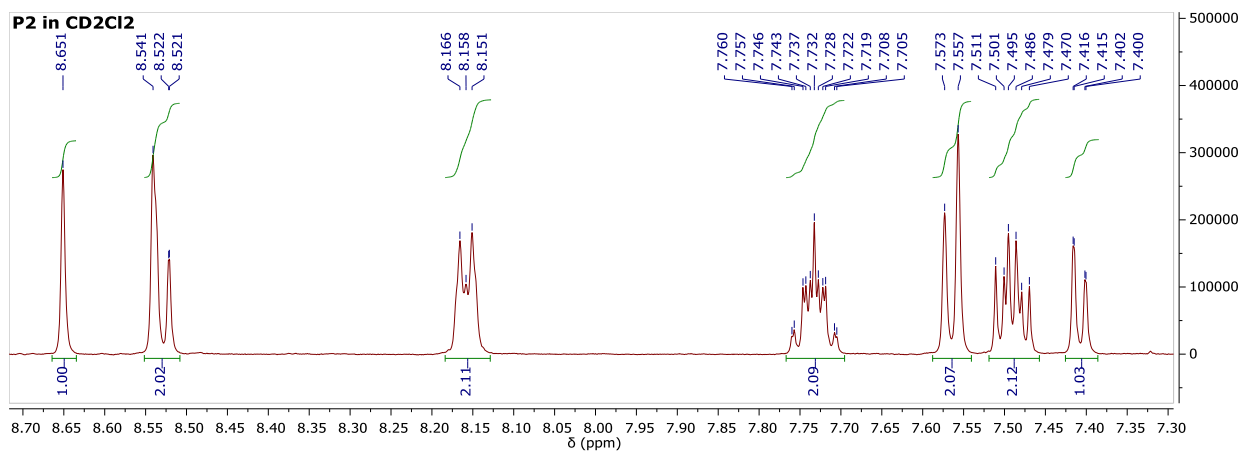

**Figure S5.**  $^1\text{H}$  NMR spectrum of **2** (zoomed into aromatic region) in  $\text{CD}_2\text{Cl}_2$  (500 MHz).

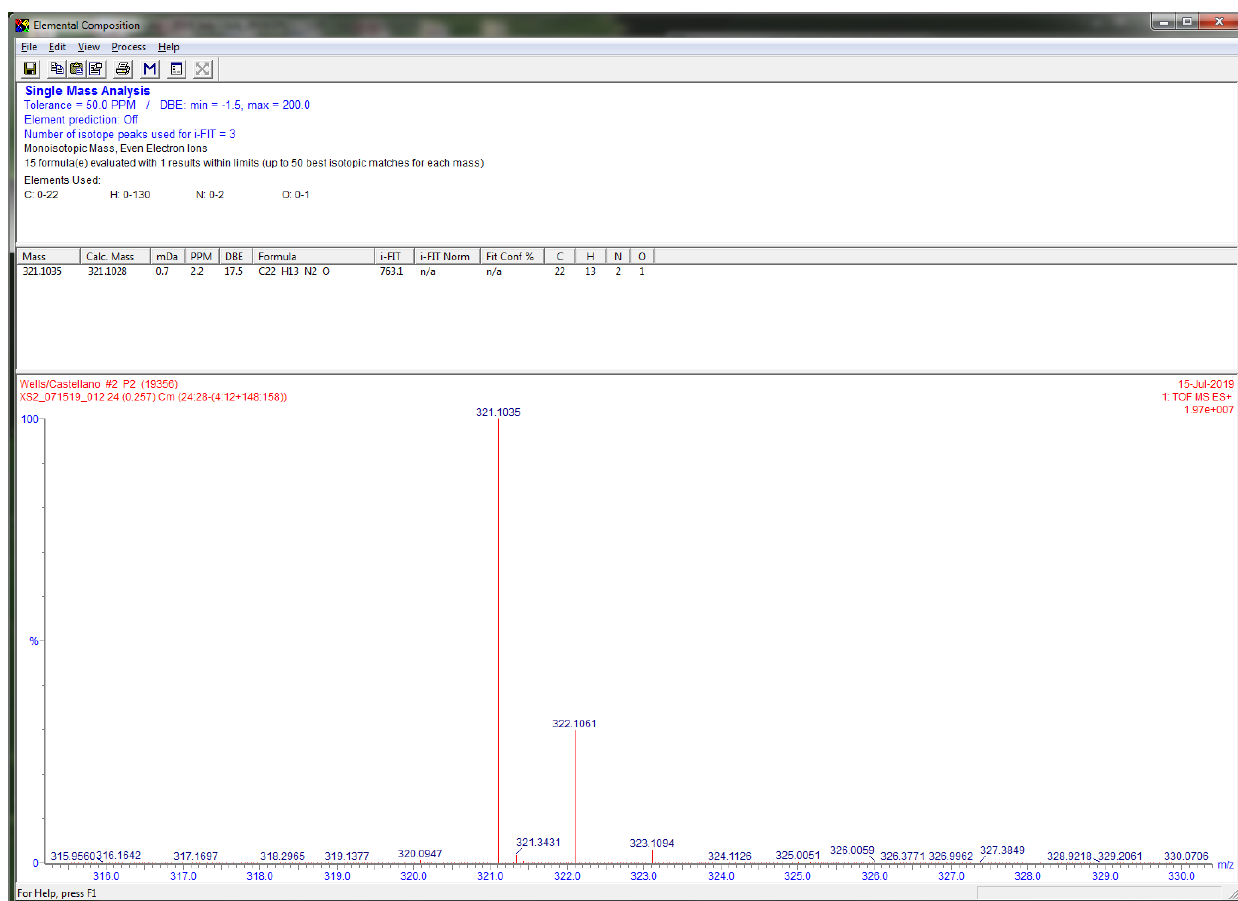

**Figure S6.** High resolution mass spectrum of **2**.

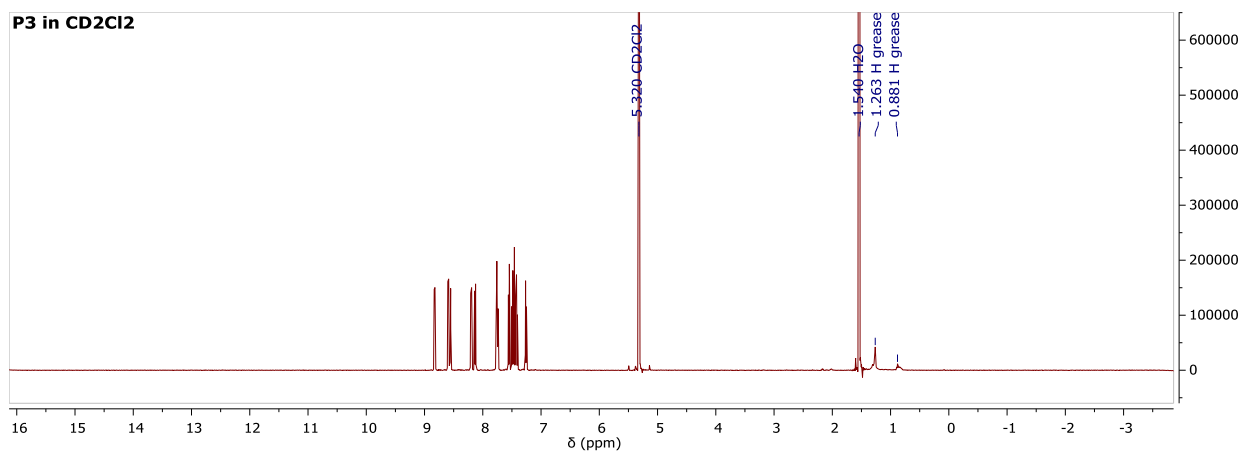

**Figure S7.**  $^1\text{H}$  NMR spectrum of **3** in  $\text{CD}_2\text{Cl}_2$  (500 MHz).

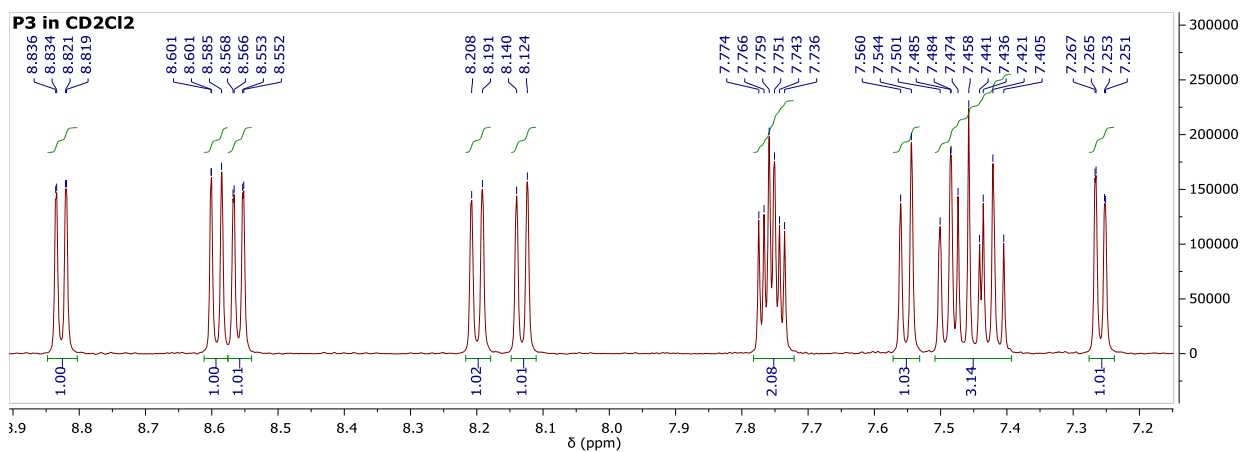

**Figure S8.**  $^1\text{H}$  NMR spectrum of **3** (zoomed into aromatic region) in  $\text{CD}_2\text{Cl}_2$  (500 MHz).

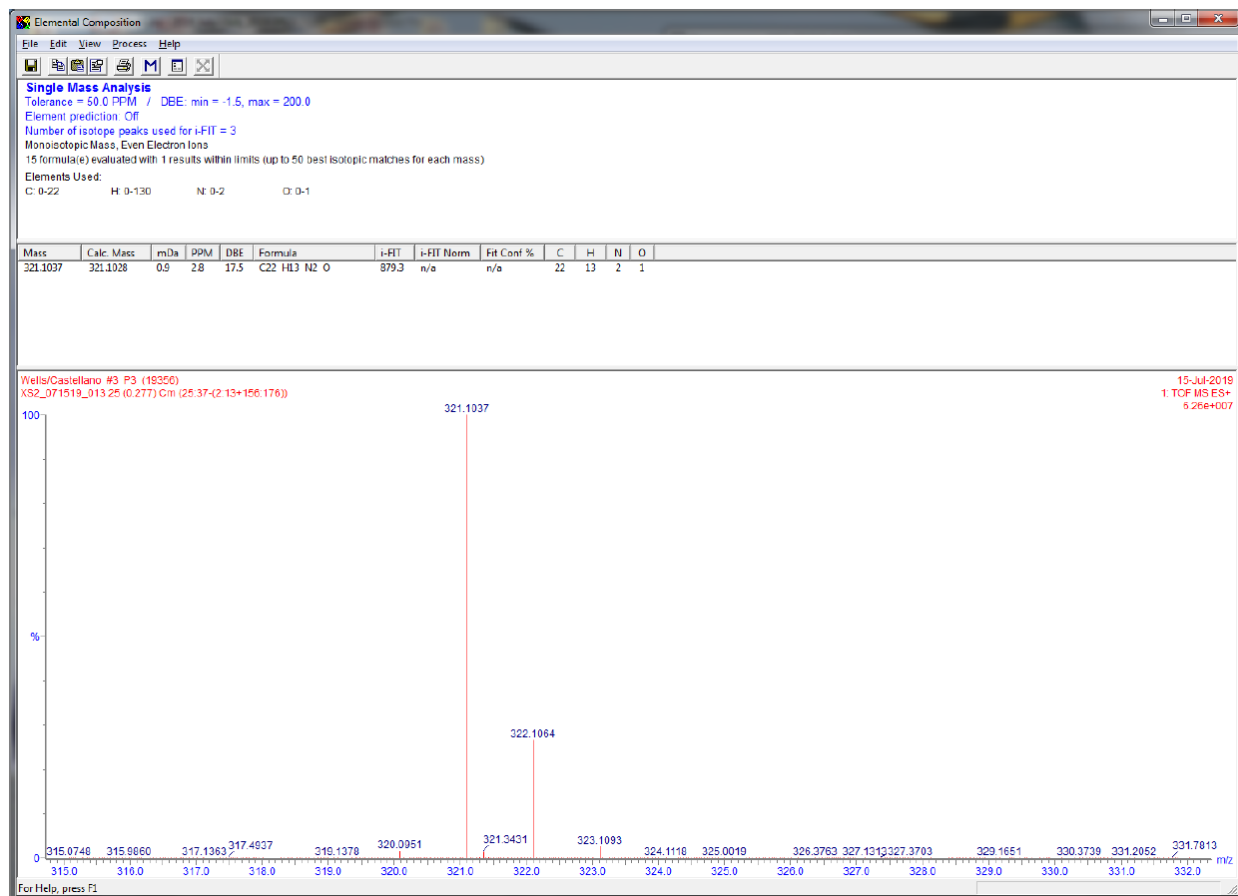

**Figure S9.** High resolution mass spectrum of **3**.

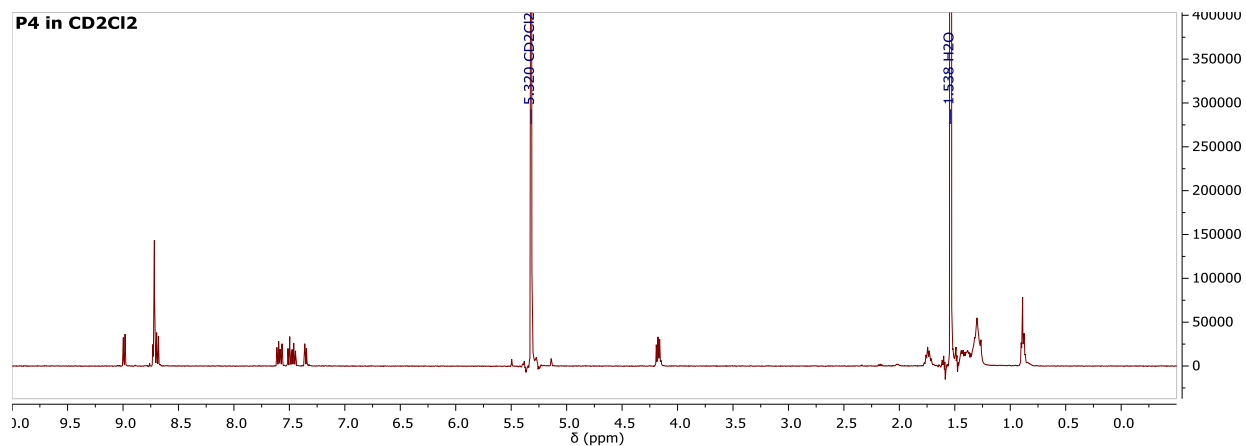

**Figure S10.**  $^1\text{H}$  NMR spectrum of **4** in  $\text{CD}_2\text{Cl}_2$  (500 MHz).

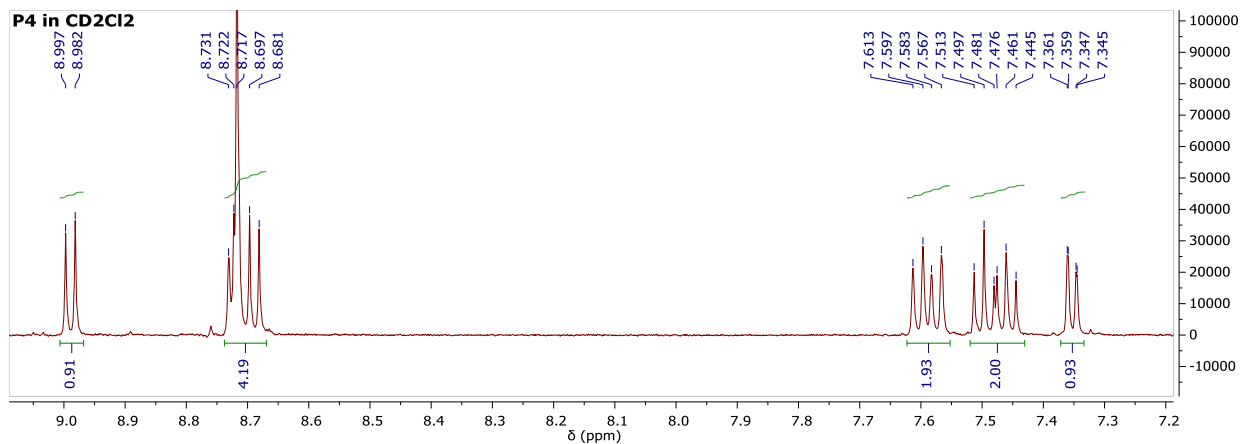

**Figure S11.** <sup>1</sup>H NMR spectrum of **4** (zoomed into aromatic region) in CD<sub>2</sub>Cl<sub>2</sub> (500 MHz).

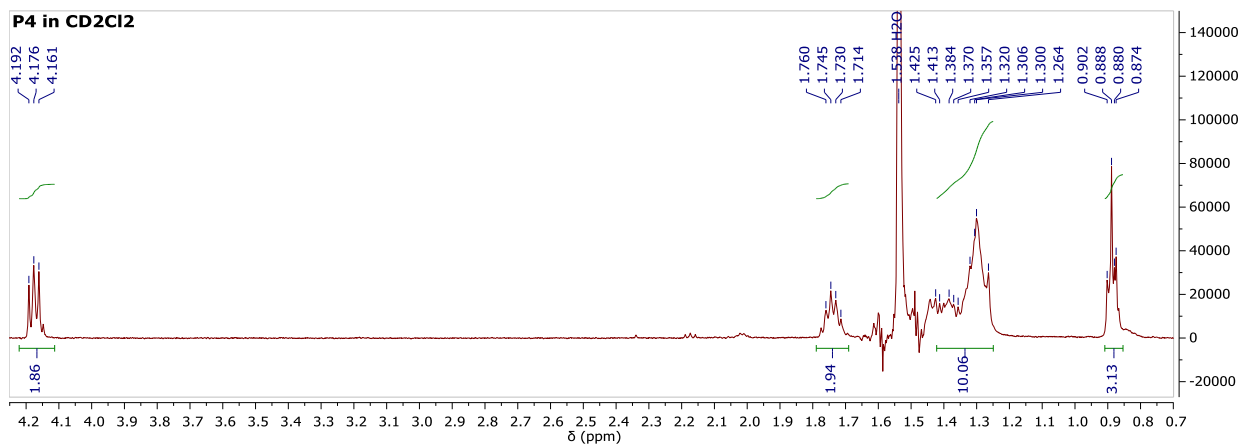

**Figure S12.** <sup>1</sup>H NMR spectrum of **4** (zoomed into aliphatic region) in CD<sub>2</sub>Cl<sub>2</sub> (500 MHz).

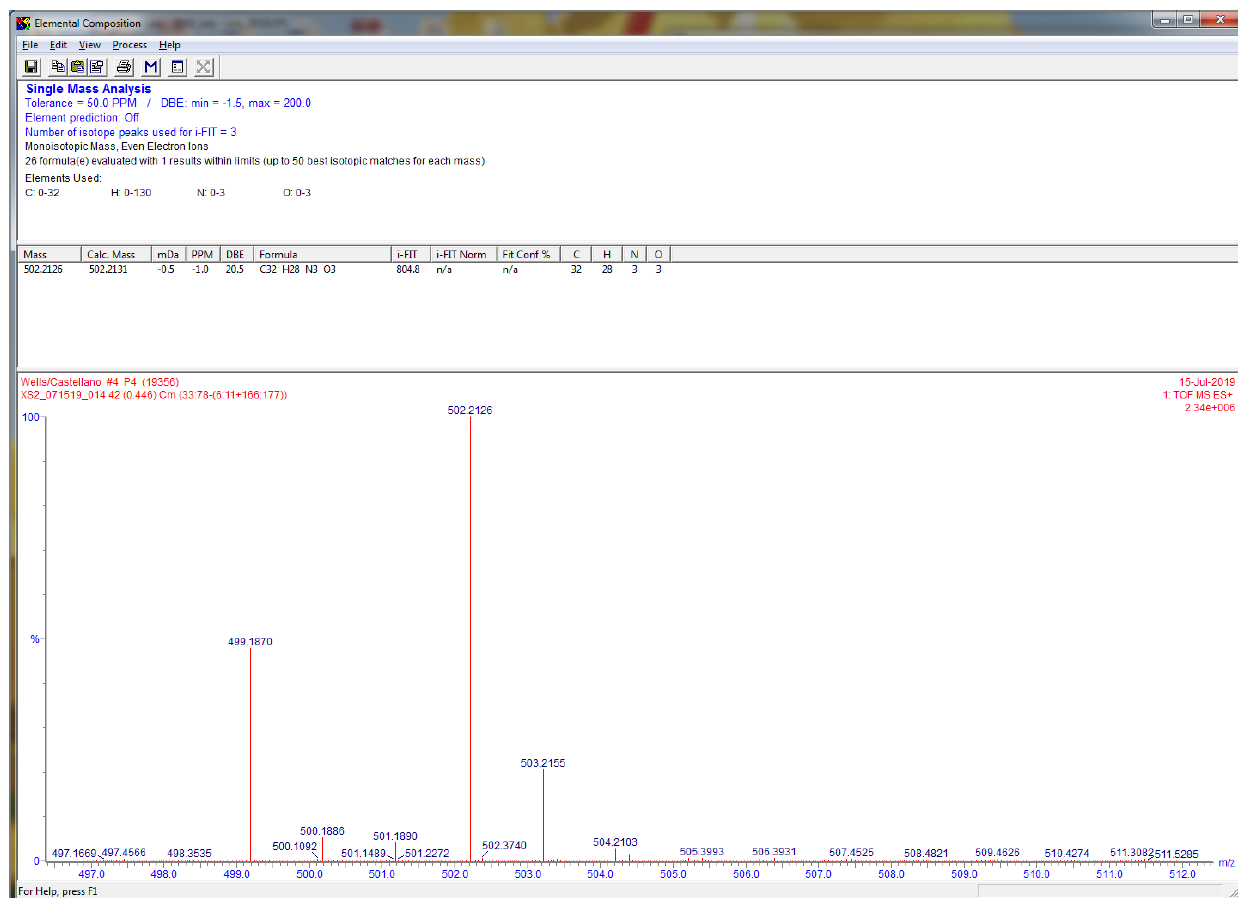

Figure S13. High resolution mass spectrum of **4**.

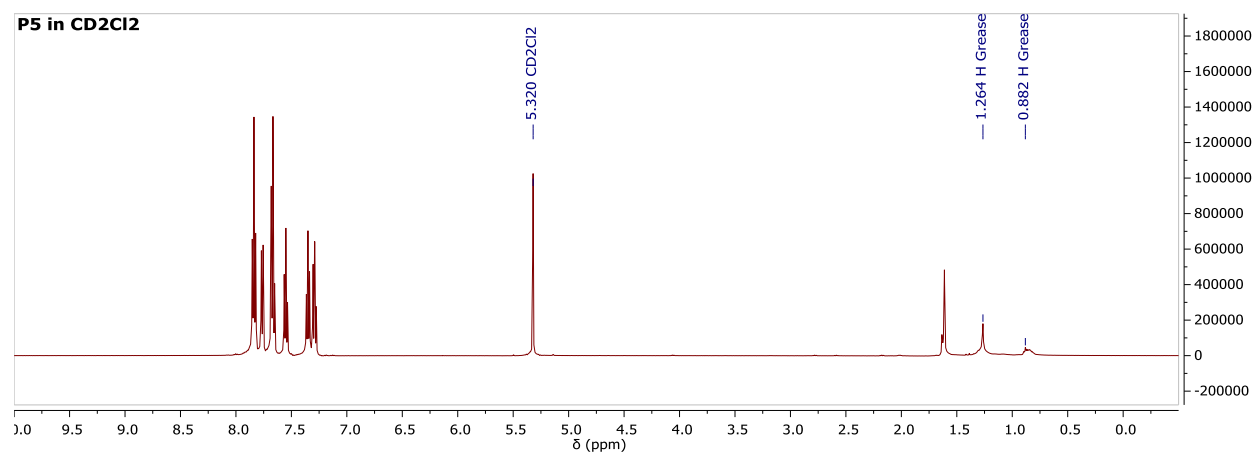

Figure S14. <sup>1</sup>H NMR spectrum of **5** in CD<sub>2</sub>Cl<sub>2</sub> (500 MHz).



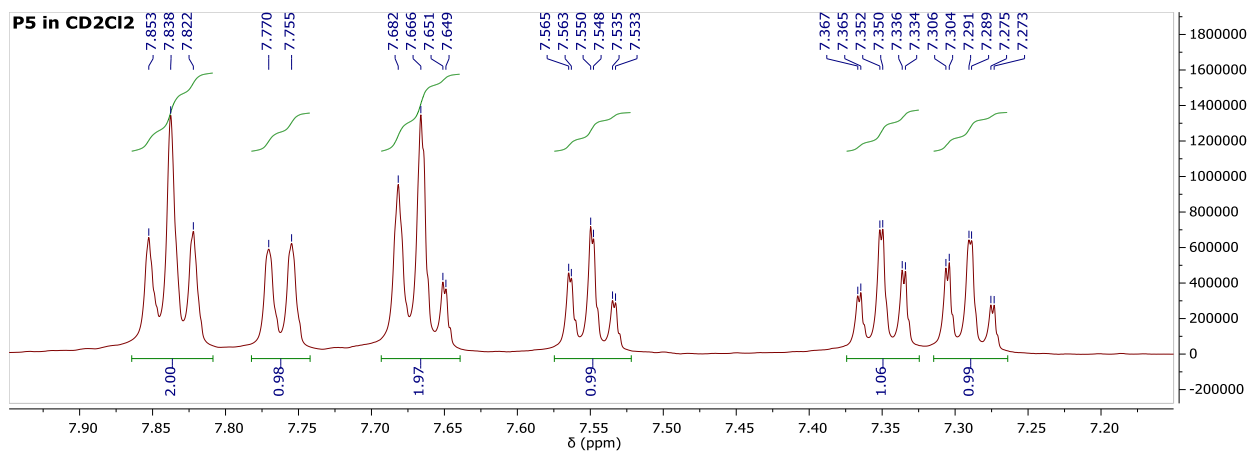

Figure S15.  $^1\text{H}$  NMR spectrum of **5** (zoomed into aromatic region) in  $\text{CD}_2\text{Cl}_2$  (500 MHz).

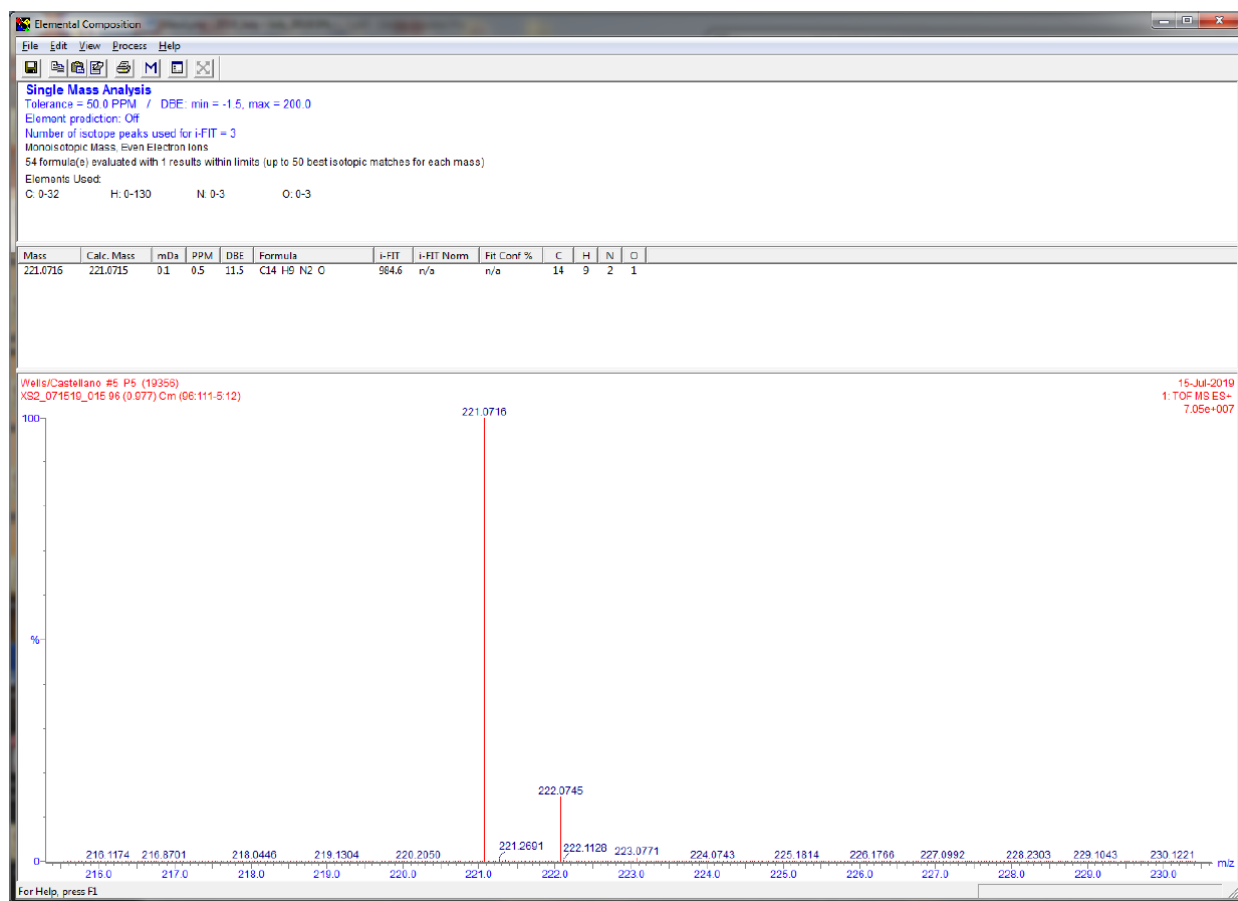

Figure S16. High resolution mass spectrum of **5**.

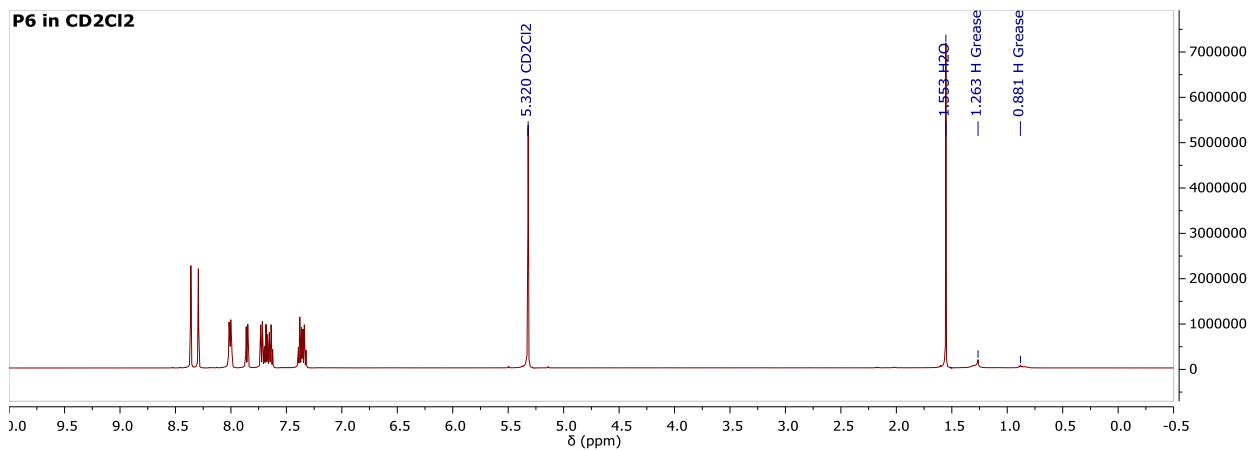

**Figure S17.** <sup>1</sup>H NMR spectrum of **6** in CD<sub>2</sub>Cl<sub>2</sub> (500 MHz).

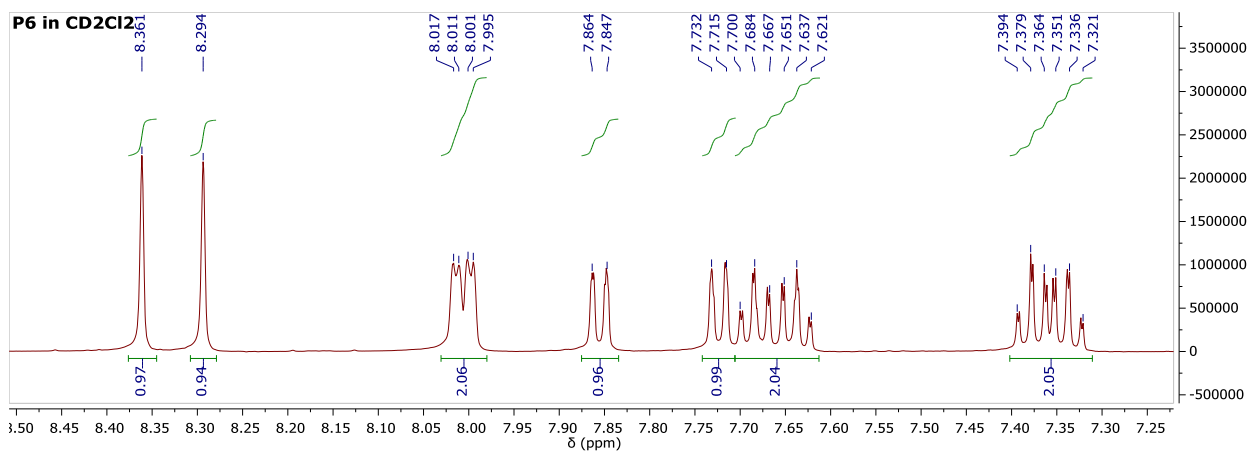

**Figure S18.** <sup>1</sup>H NMR spectrum of **6** (zoomed into aromatic region) in CD<sub>2</sub>Cl<sub>2</sub> (500 MHz).

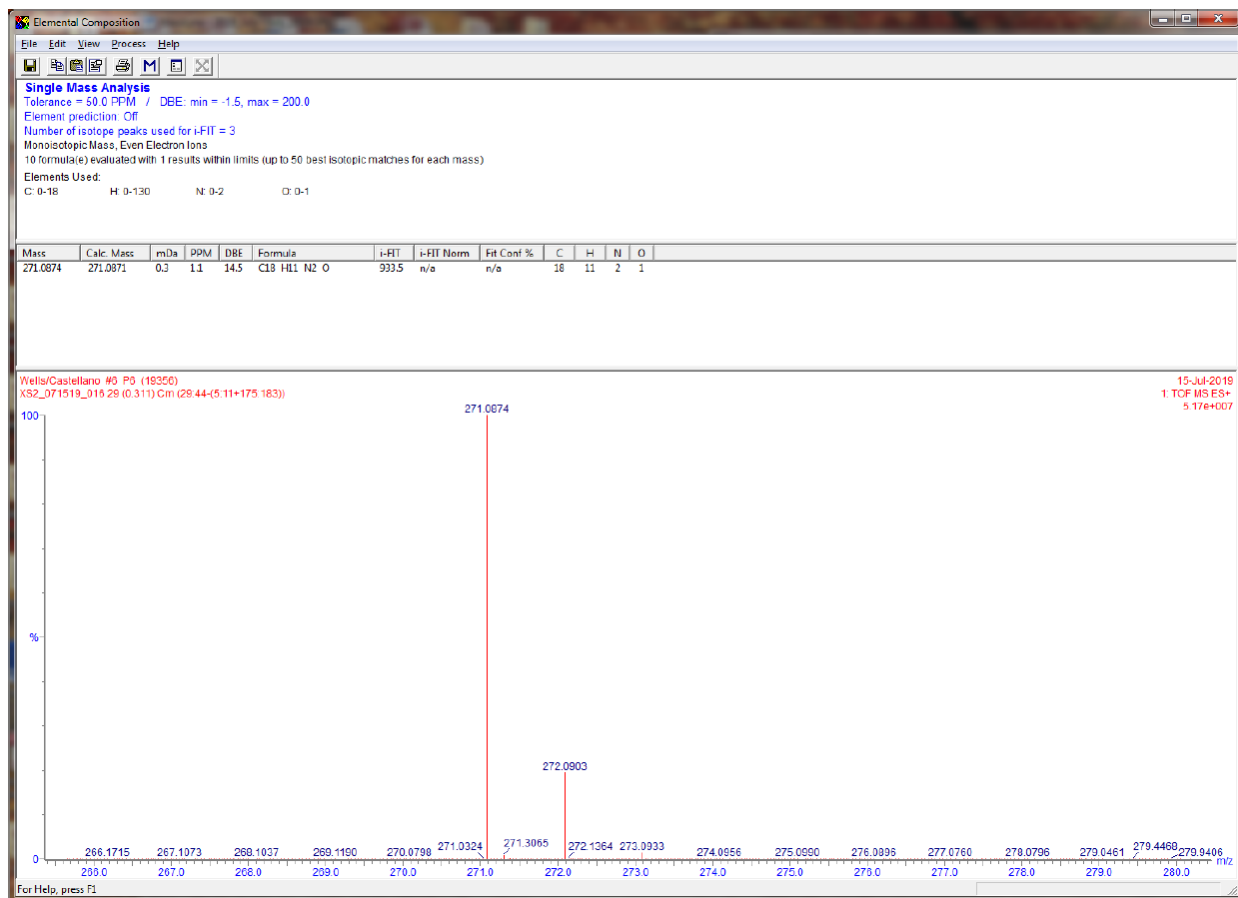

Figure S19. High resolution mass spectrum of 6.

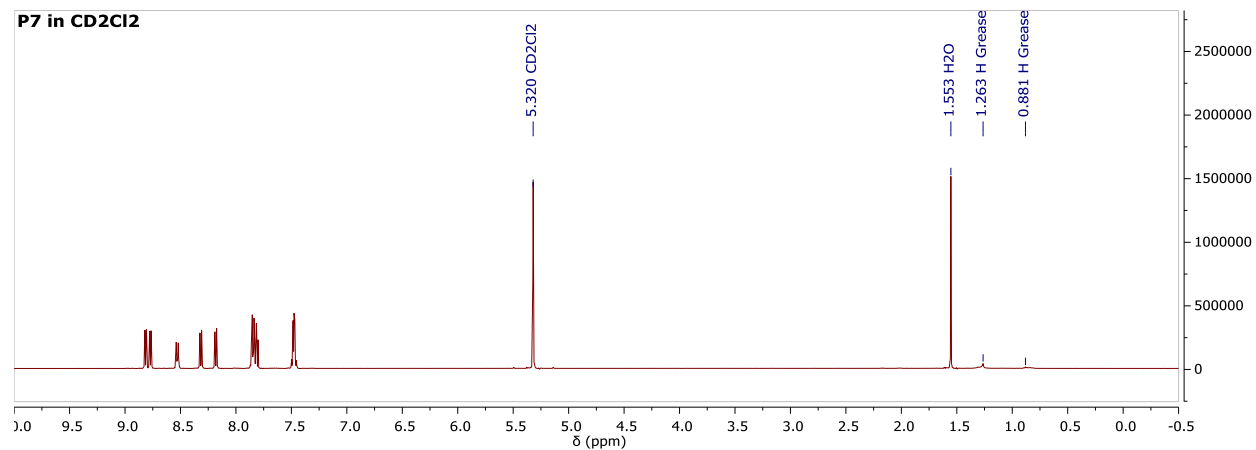

Figure S20. <sup>1</sup>H NMR spectrum of 7 in CD<sub>2</sub>Cl<sub>2</sub> (500 MHz).

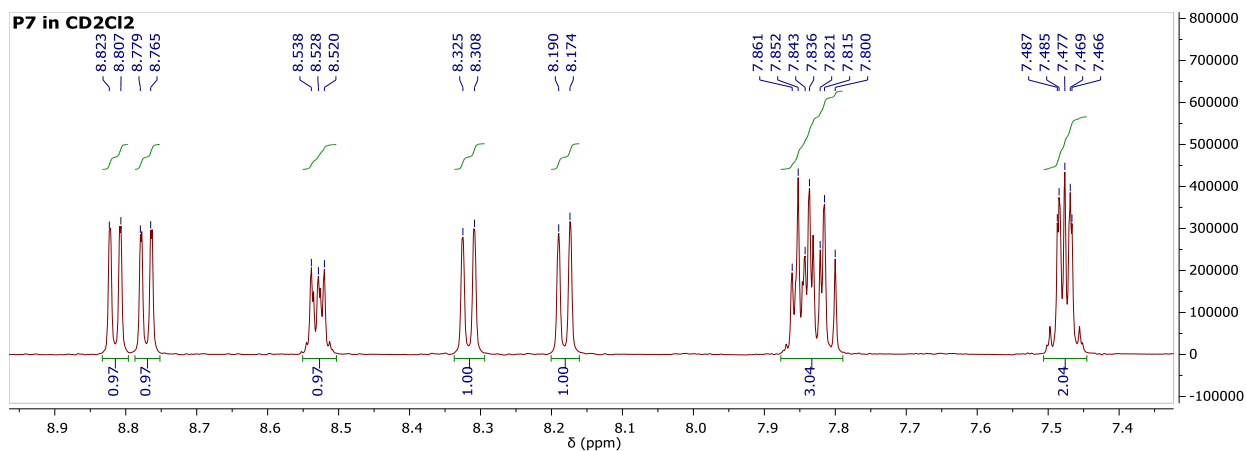

**Figure S21.** <sup>1</sup>H NMR spectrum of **7** (zoomed into aromatic region) in CD<sub>2</sub>Cl<sub>2</sub> (500 MHz).

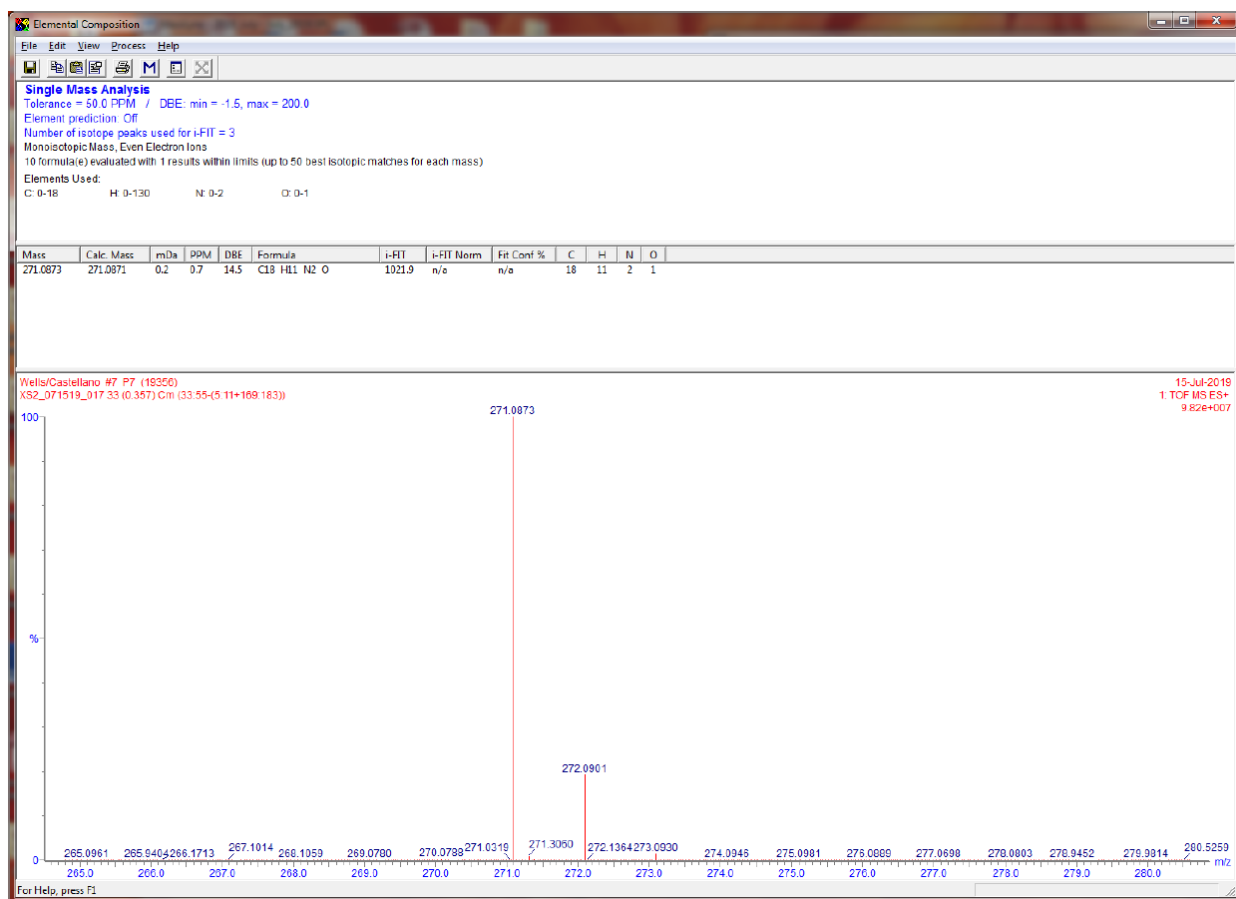

**Figure S22.** High resolution mass spectrum of **7**.

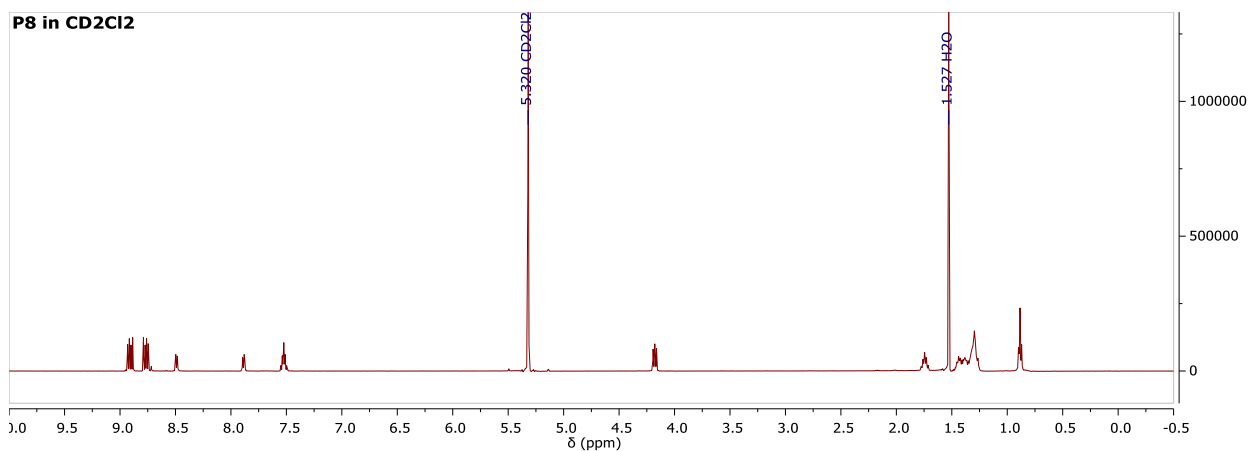

**Figure S23.** <sup>1</sup>H NMR spectrum of **8** in CD<sub>2</sub>Cl<sub>2</sub> (500 MHz).

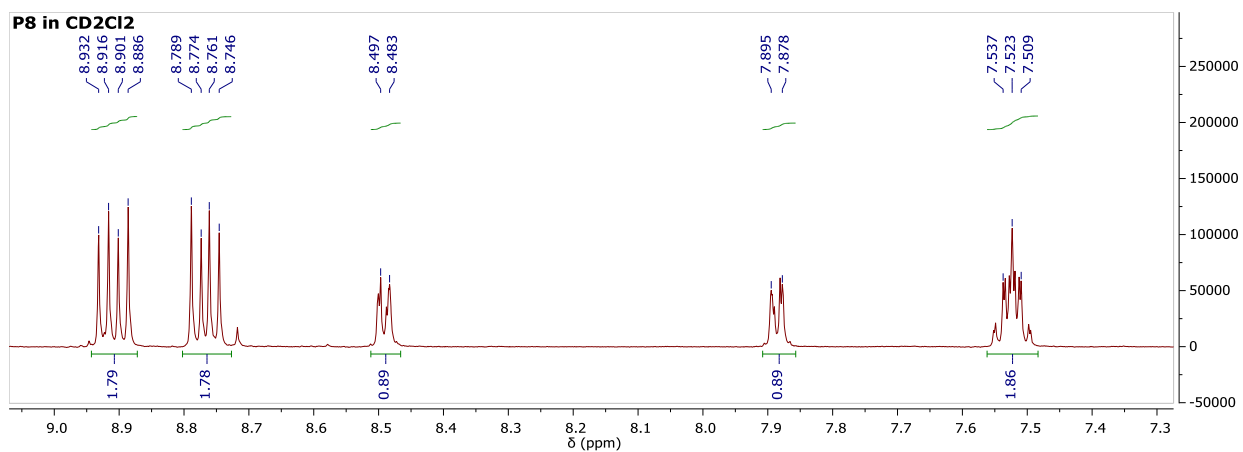

**Figure S24.** <sup>1</sup>H NMR spectrum of **8** (zoomed into aromatic region) in CD<sub>2</sub>Cl<sub>2</sub> (500 MHz).

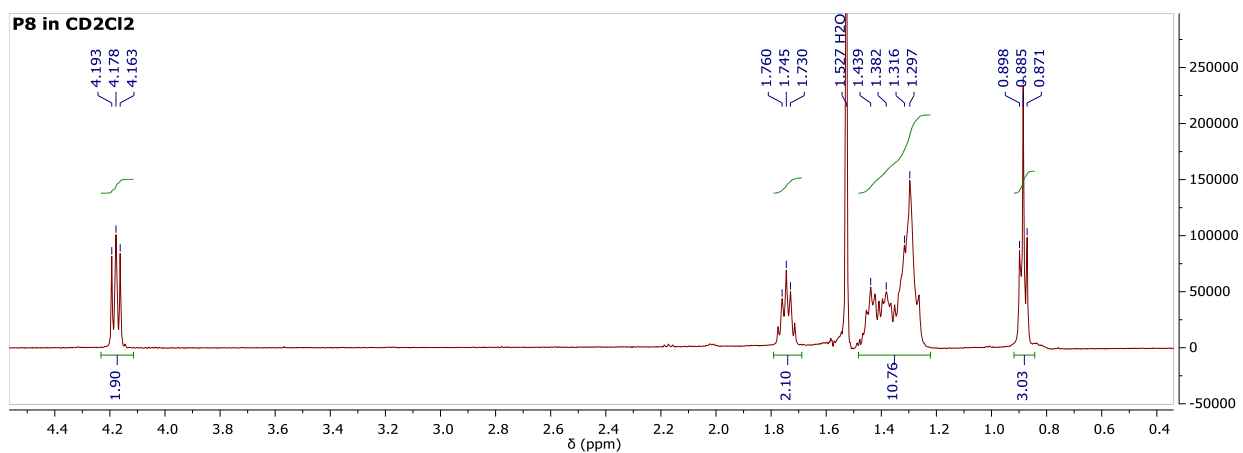

**Figure S25.** <sup>1</sup>H NMR spectrum of **8** (zoomed into aliphatic region) in CD<sub>2</sub>Cl<sub>2</sub> (500 MHz).

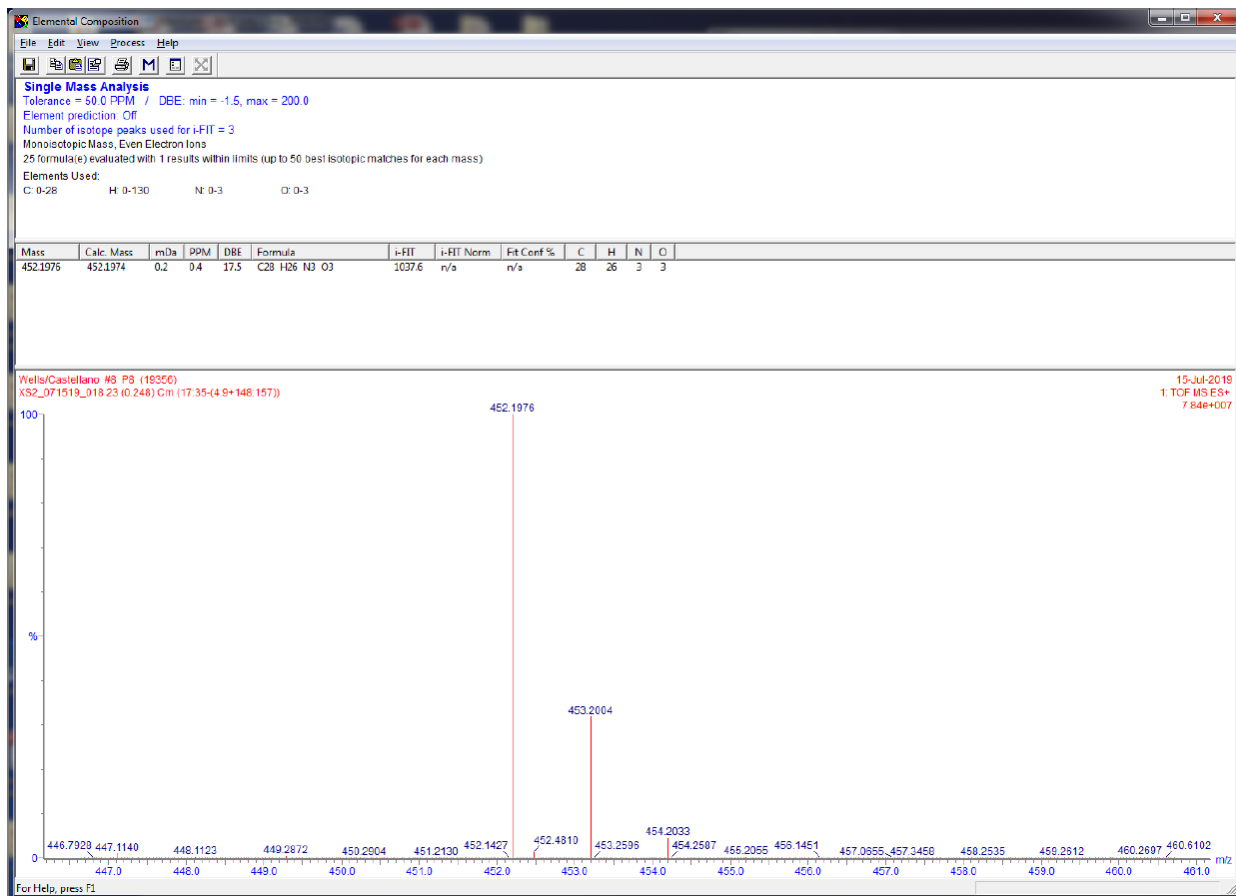

Figure S26. High resolution mass spectrum of 8.

## 2. Additional DFT Results

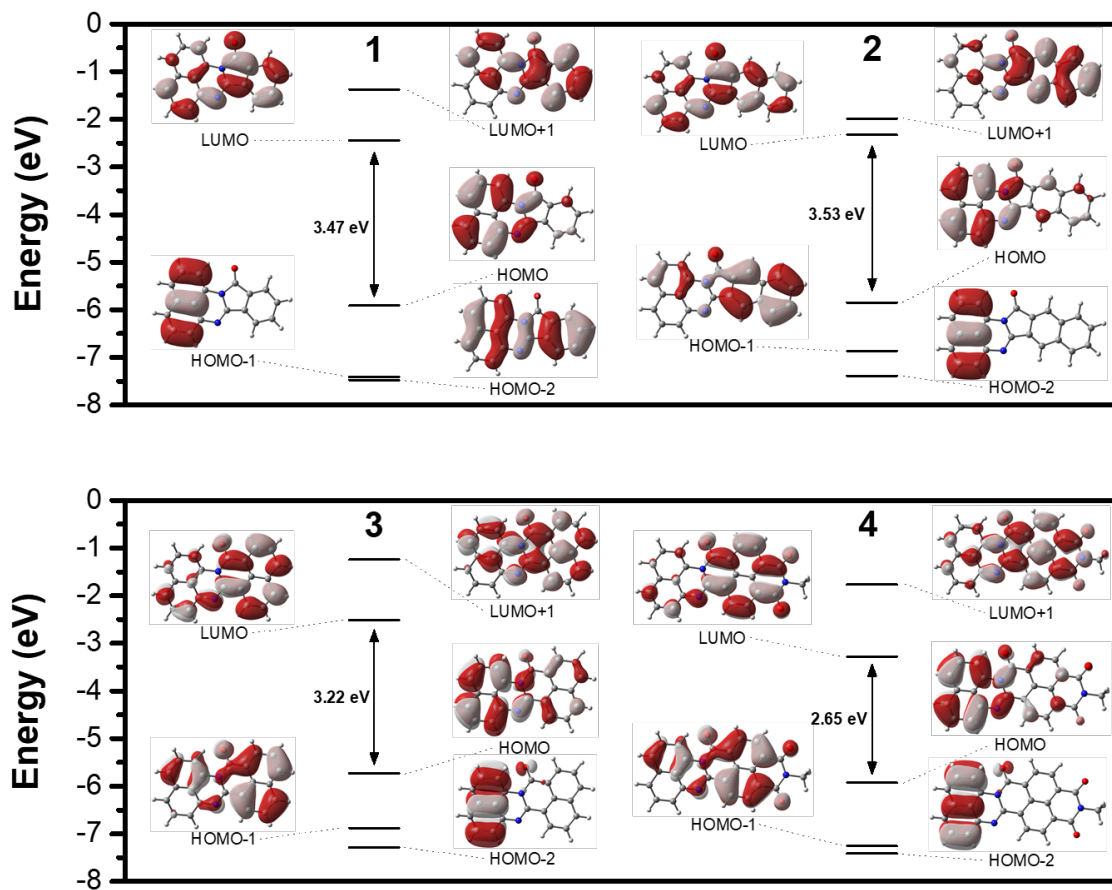

Figure S27. Frontier orbital diagram of 1-4 using M06-D3/Def2-TZVP level of theory.

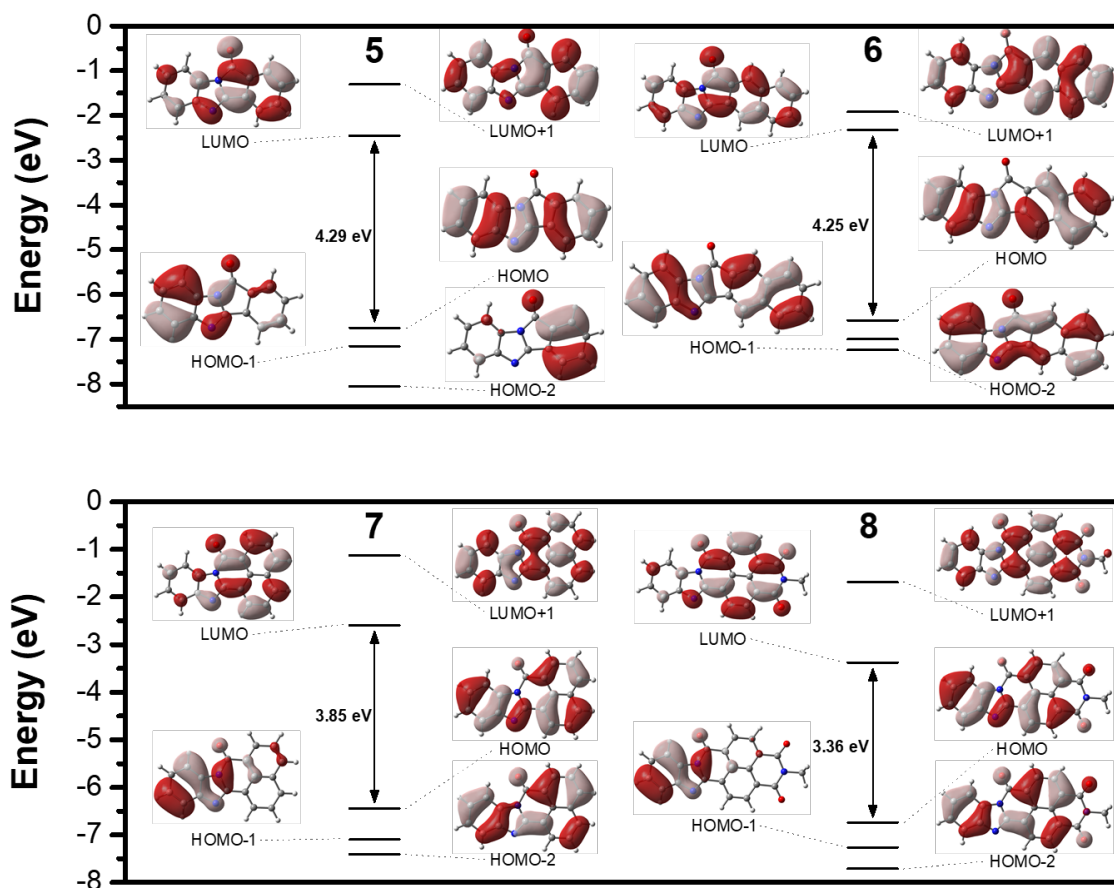

**Figure S28.** Frontier orbital diagram of **5-8** using M06-D3/Def2-TZVP level of theory.

**Table S1.** Select frontier molecular orbital energies (eV) as determined at the M06-D3/Def2-TZVP level of theory.

|        | 1      | 2      | 3      | 4      | 5      | 6      | 7      | 8      |
|--------|--------|--------|--------|--------|--------|--------|--------|--------|
| LUMO+1 | -1.372 | -1.988 | -1.242 | -1.766 | -1.304 | -1.920 | -1.122 | -1.686 |
| LUMO   | -2.444 | -2.322 | -2.514 | -3.277 | -2.452 | -2.321 | -2.592 | -3.378 |
| HOMO   | -5.911 | -5.848 | -5.733 | -5.922 | -6.744 | -6.573 | -6.443 | -6.742 |
| HOMO-1 | -7.406 | -6.866 | -6.878 | -7.251 | -7.148 | -6.999 | -7.100 | -7.264 |
| HOMO-2 | -7.477 | -7.385 | -7.283 | -7.415 | -8.049 | -7.235 | -7.408 | -7.710 |



**Table S2.** Selected electronic excitation wavelengths (nm) and corresponding oscillator strengths ( $f$ ), compositions, and contributions.

| molecule | electronic transitions | $\lambda_{\text{calc}}$ (nm) | $f$    | composition <sup>[a]</sup>                               |
|----------|------------------------|------------------------------|--------|----------------------------------------------------------|
| <b>1</b> | $S_0 \rightarrow S_1$  | 459.8                        | 0.2795 | H $\rightarrow$ L (96%)                                  |
|          | $S_0 \rightarrow S_2$  | 341.1                        | 0.0710 | H $\rightarrow$ L +1 (87%)                               |
| <b>2</b> | $S_0 \rightarrow S_1$  | 451.2                        | 0.3724 | H $\rightarrow$ L (92%)                                  |
|          | $S_0 \rightarrow S_2$  | 396.5                        | 0.1171 | H $\rightarrow$ L +1 (85%)                               |
| <b>3</b> | $S_0 \rightarrow S_1$  | 493.7                        | 0.3415 | H $\rightarrow$ L (98%)                                  |
|          | $S_0 \rightarrow S_2$  | 356.3                        | 0.0469 | H $\rightarrow$ L +1 (89%)                               |
| <b>4</b> | $S_0 \rightarrow S_1$  | 608.6                        | 0.3636 | H $\rightarrow$ L (99%)                                  |
|          | $S_0 \rightarrow S_2$  | 384.3                        | 0.3868 | H -1 $\rightarrow$ L (94%)                               |
| <b>5</b> | $S_0 \rightarrow S_1$  | 385.4                        | 0.0659 | H $\rightarrow$ L (94%)                                  |
|          | $S_0 \rightarrow S_2$  | 326.1                        | 0.1638 | H -1 $\rightarrow$ L (87%)                               |
| <b>6</b> | $S_0 \rightarrow S_1$  | 379.5                        | 0.1507 | H $\rightarrow$ L (92%)                                  |
|          | $S_0 \rightarrow S_2$  | 344.6                        | 0.0113 | H -1 $\rightarrow$ L (63%)<br>H $\rightarrow$ L +1 (30%) |
| <b>7</b> | $S_0 \rightarrow S_1$  | 400.7                        | 0.3584 | H $\rightarrow$ L (98%)                                  |
|          | $S_0 \rightarrow S_2$  | 340.7                        | 0.0430 | H -2 $\rightarrow$ L (90%)                               |
| <b>8</b> | $S_0 \rightarrow S_1$  | 465.1                        | 0.4268 | H $\rightarrow$ L (97%)                                  |
|          | $S_0 \rightarrow S_2$  | 396.8                        | 0.0658 | H -1 $\rightarrow$ L (97%)                               |

[a] Only contributions >10% are included.

### 3. Additional Optical Spectra

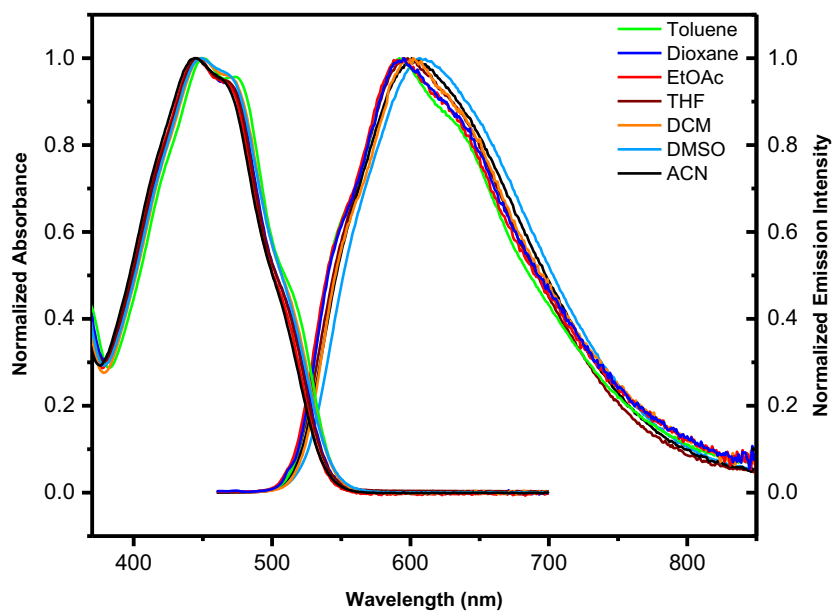

**Figure S29.** Solvent-Dependent Absorbance and Emission of Chromophore 1.

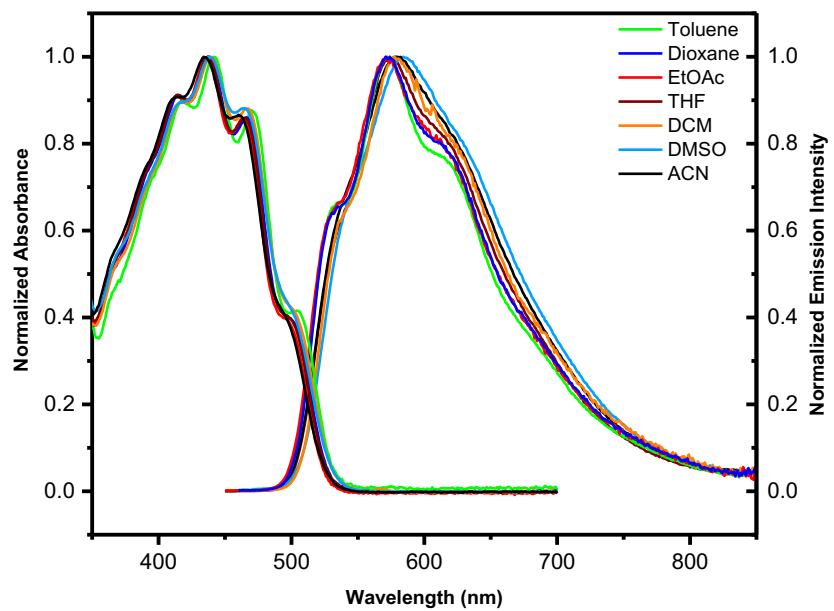

**Figure S30.** Solvent-Dependent Absorbance and Emission of Chromophore 2.

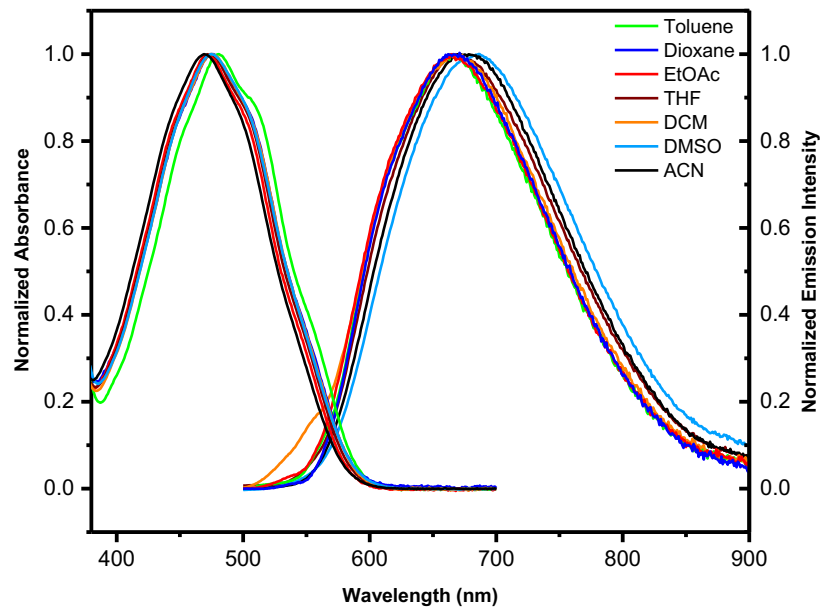

**Figure S31.** Solvent-Dependent Absorbance and Emission of Chromophore 3.

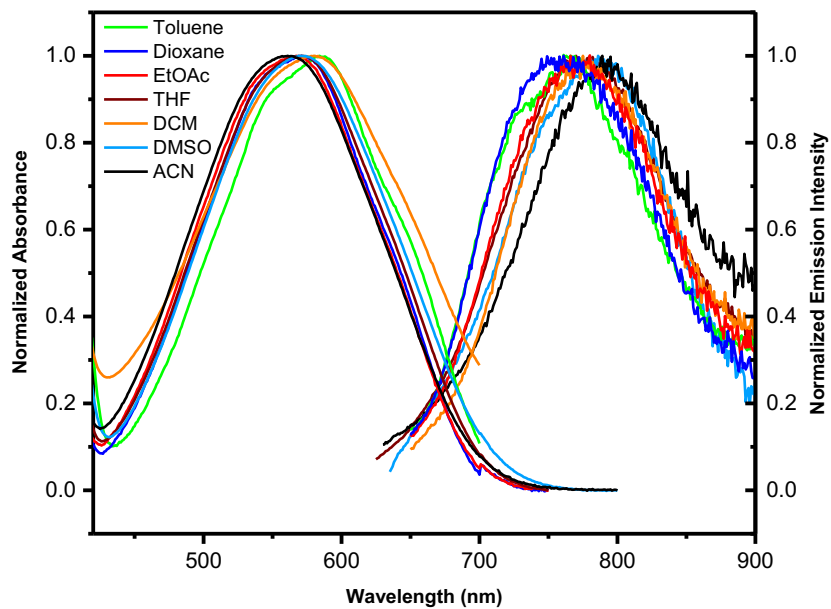

**Figure S32.** Solvent-Dependent Absorbance and Emission of Chromophore 4.

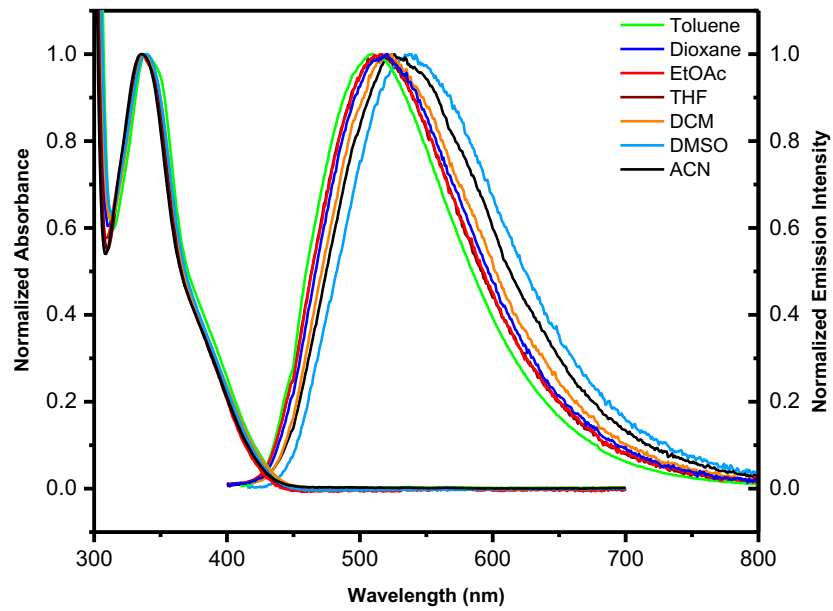

**Figure S33.** Solvent-Dependent Absorbance and Emission of Chromophore **5**.

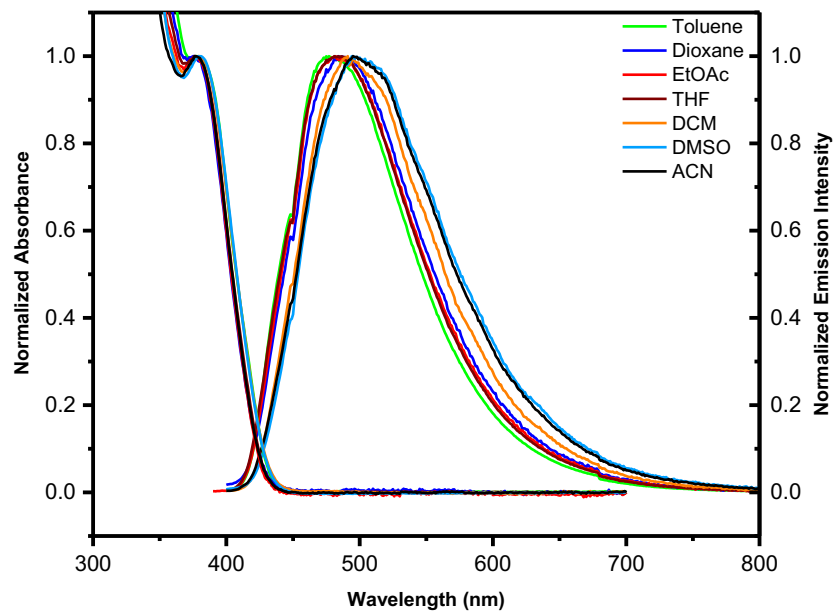

**Figure S34.** Solvent-Dependent Absorbance and Emission of Chromophore **6**.

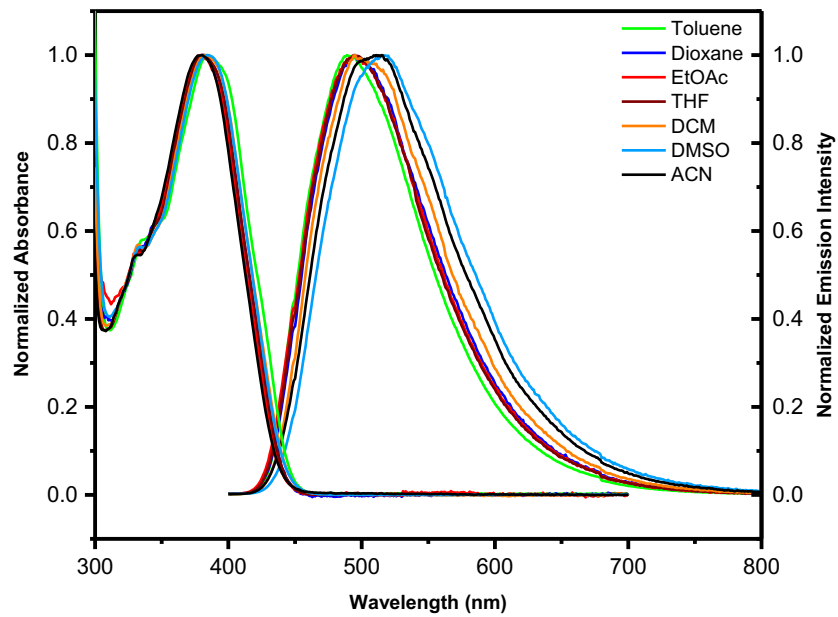

**Figure S35.** Solvent-Dependent Absorbance and Emission of Chromophore **7**.

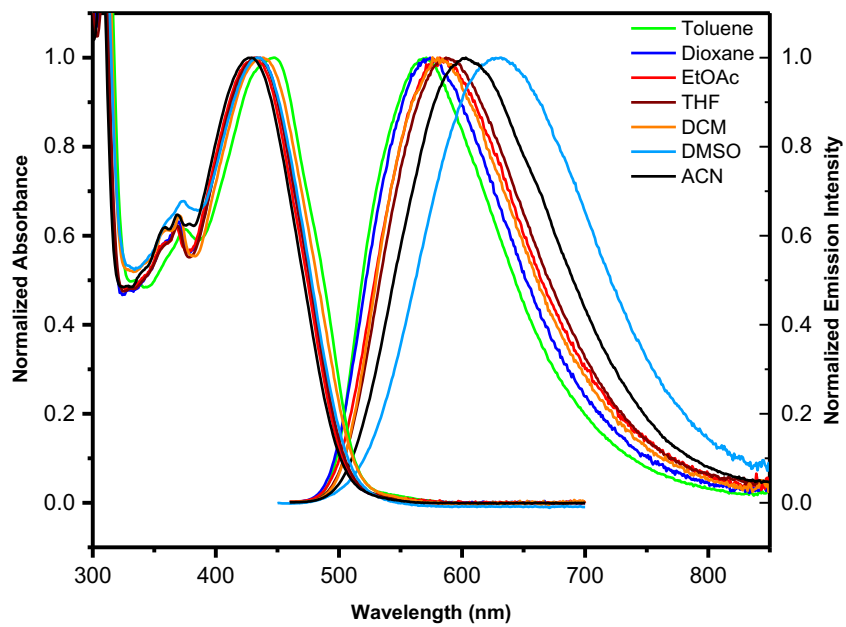

**Figure S36.** Solvent-Dependent Absorbance and Emission of Chromophore **8**.

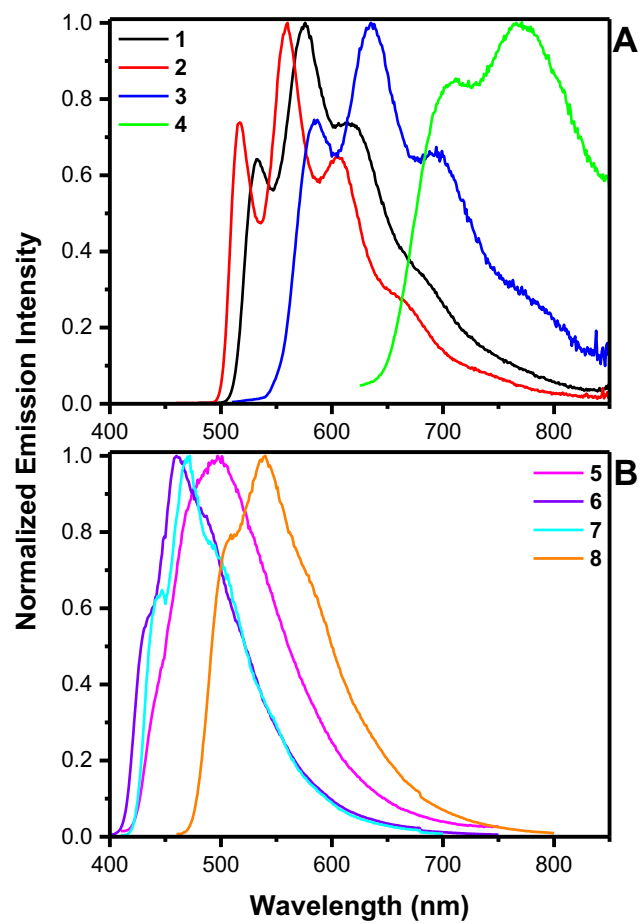

**Figure S37.** Static 77 K photoluminescence emission spectra of **1-4** (A) and **5-8** (B) in 2-methyl-THF.

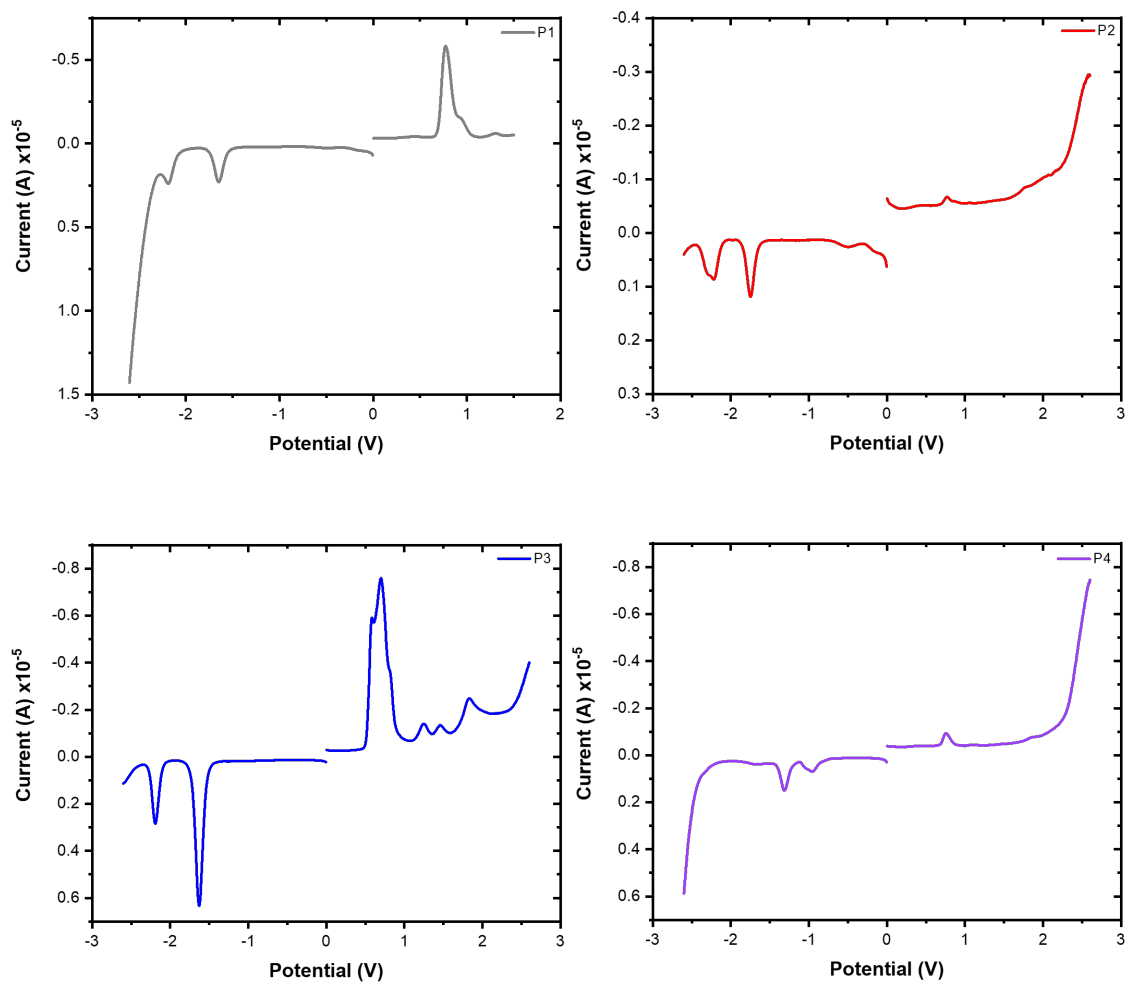

**Figure S38.** Normalized differential voltametric measurement for 1-4 (1 grey, 2 red, 3 blue, 4 purple) in ACN vs Ag/AgNO<sub>3</sub>. Fc/Fc<sup>+</sup> = 0.032.

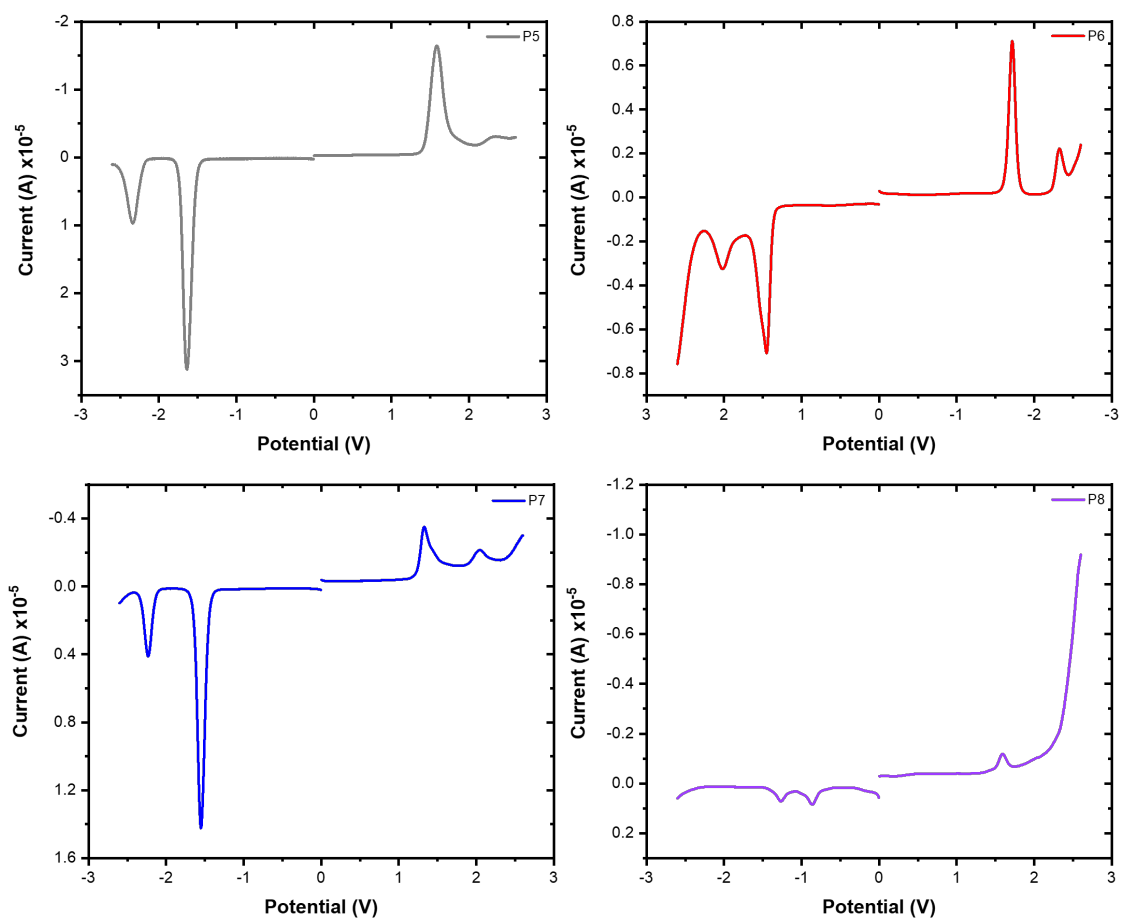

**Figure S39.** Normalized differential voltametric measurement for 5-8 (5 grey, 6 red, 7 blue, 8 purple) in ACN vs Ag/AgNO<sub>3</sub>. Fc/Fc<sup>+</sup> = 0.032.



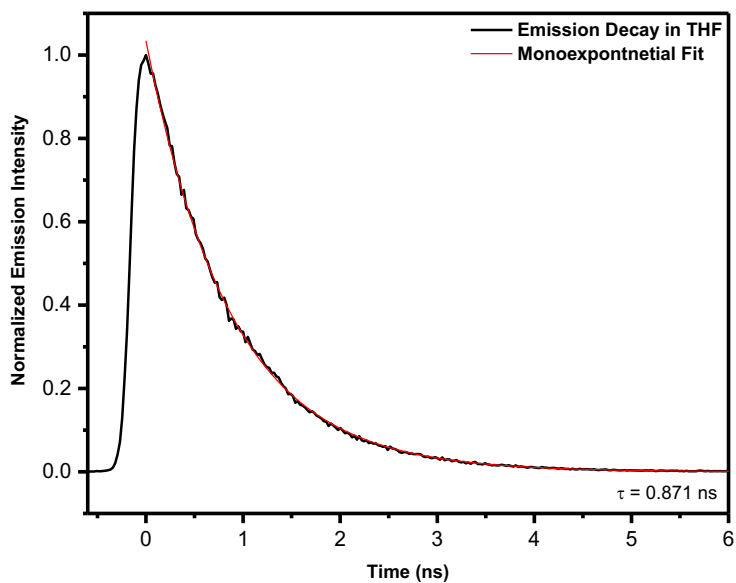

**Figure S40.** Photoluminescence decay of chromophore **1** in THF.

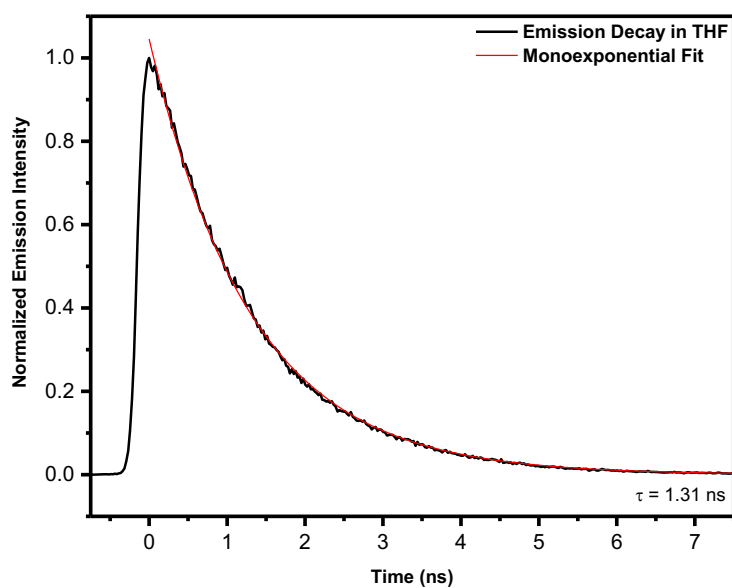

**Figure S41.** Photoluminescence decay of chromophore **2** in THF.

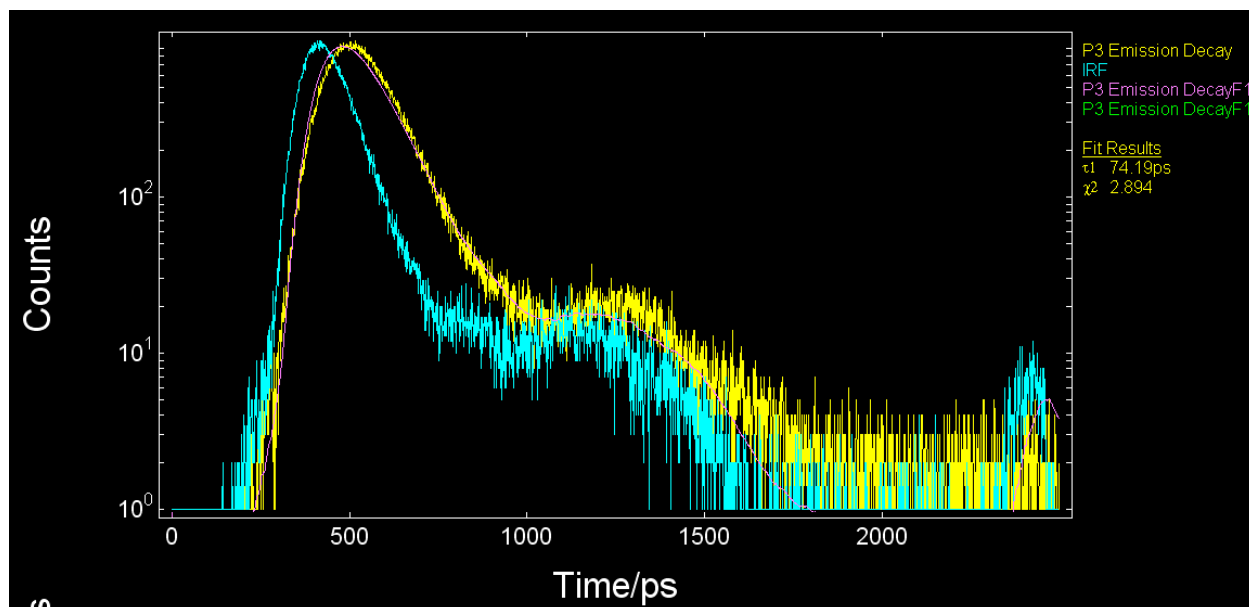

**Figure S42.** Photoluminescence decay of chromophore **3** in THF. Due to the short lifetime of this molecule, the instrument response function (IRF) was used in a deconvolution procedure to obtain the lifetime.

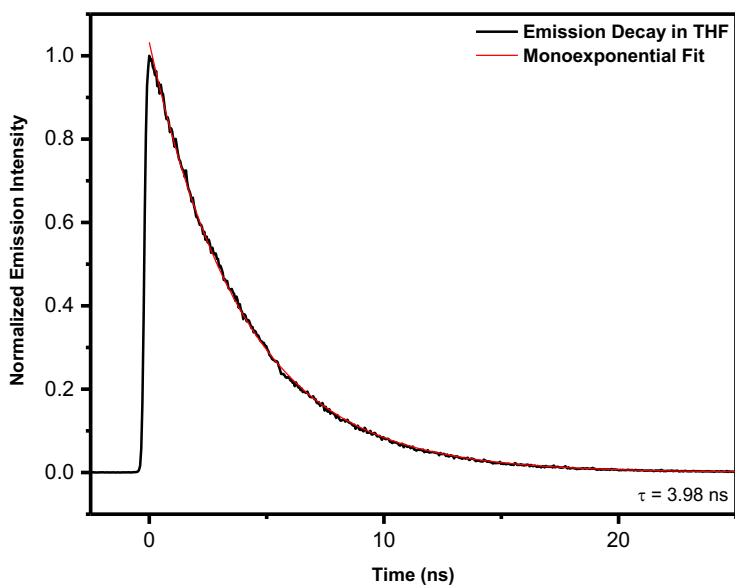

**Figure S43.** Photoluminescence decay of chromophore **5** in THF.

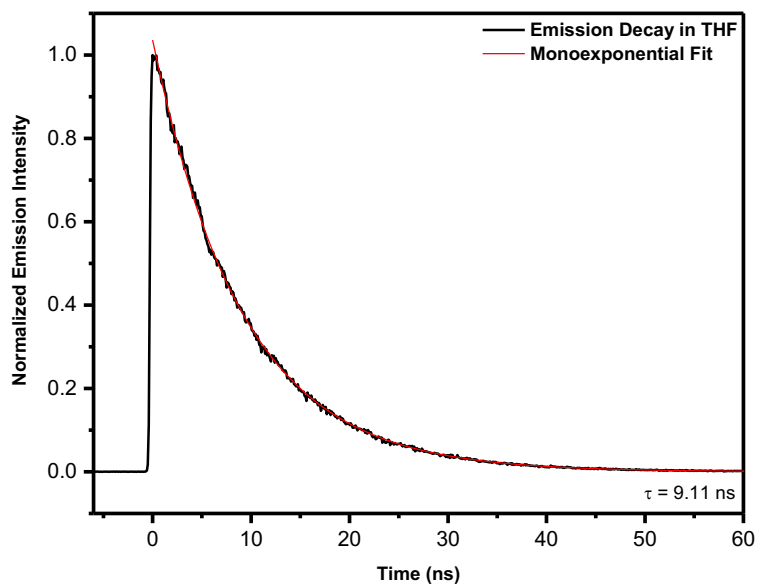

**Figure S44.** Photoluminescence decay of chromophore **6** in THF.

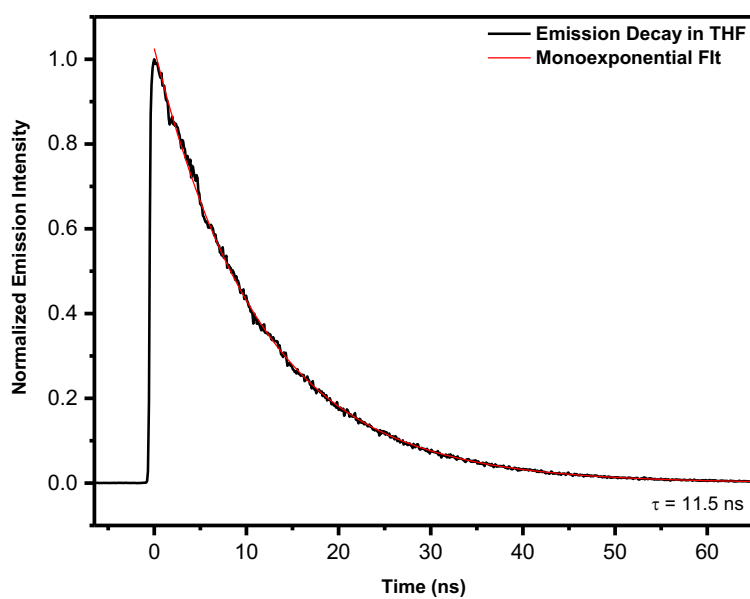

**Figure S45.** Photoluminescence decay of chromophore **7** in THF.

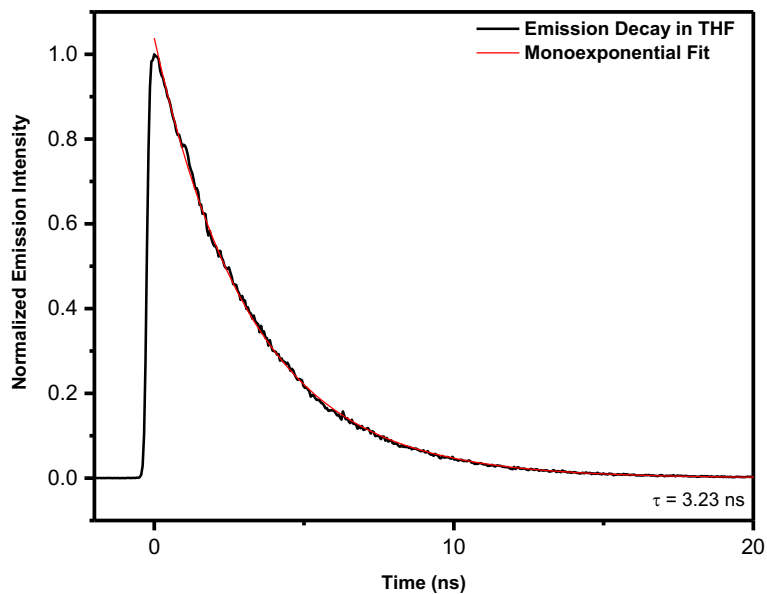

**Figure S46.** Photoluminescence decay of chromophore **8** in THF.

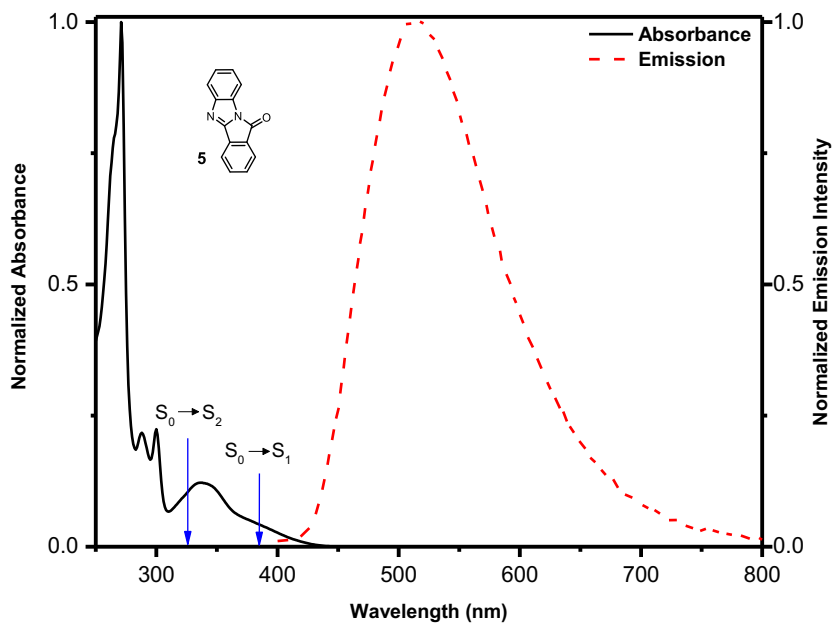

**Figure S47.** Normalized absorption (black) and emission (red) spectra of chromophore **5** overlaid with the two lowest energy vertical transitions (blue) calculated at the M06-D3/Def2-TZVP level of theory.

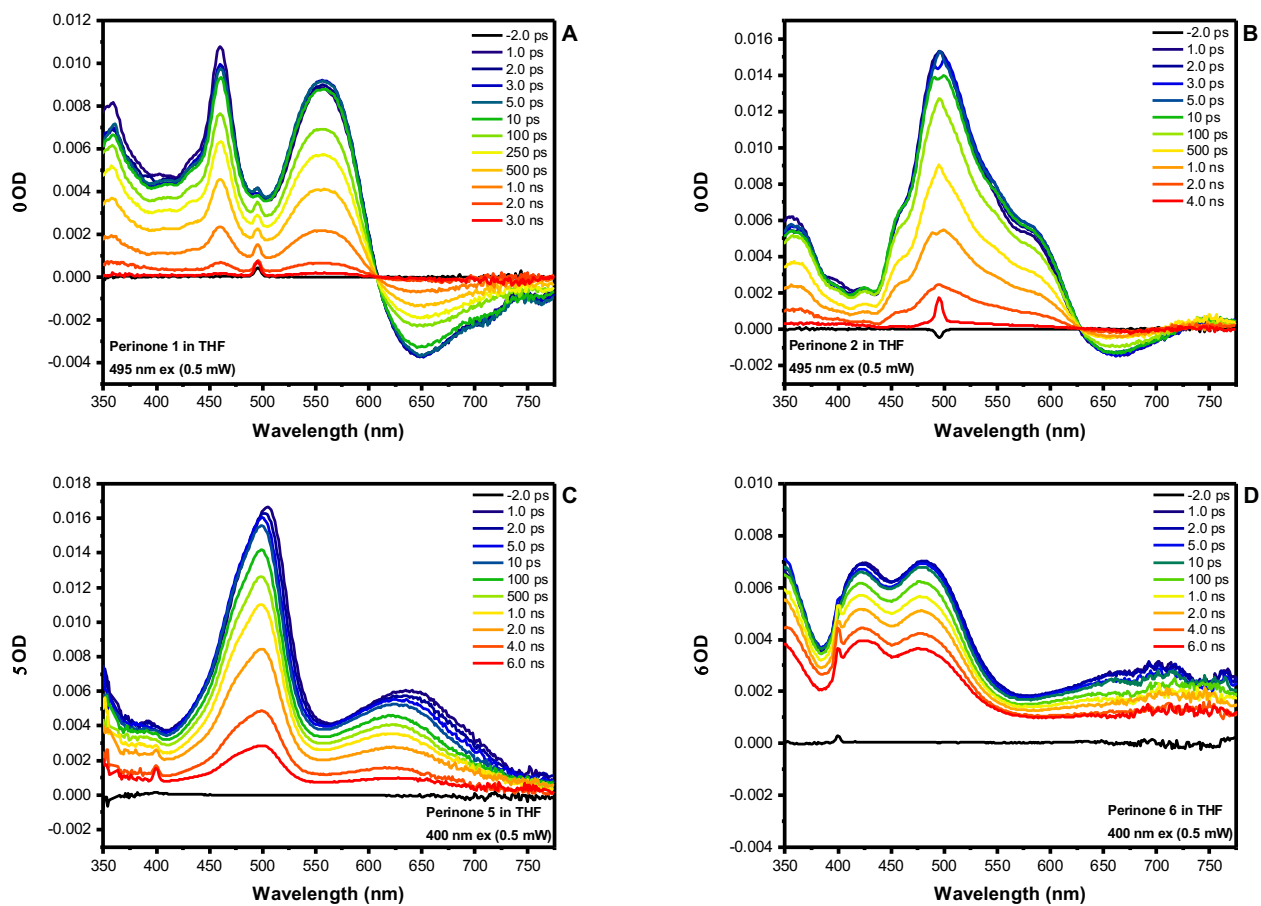

**Figure S48.** Excited-state difference spectra of **1** (A) and **2** (B) in THF following 495 nm pulsed excitation and **5** (C) and **6** (D) in THF following 400 nm pulsed excitation (105 fs fwhm).

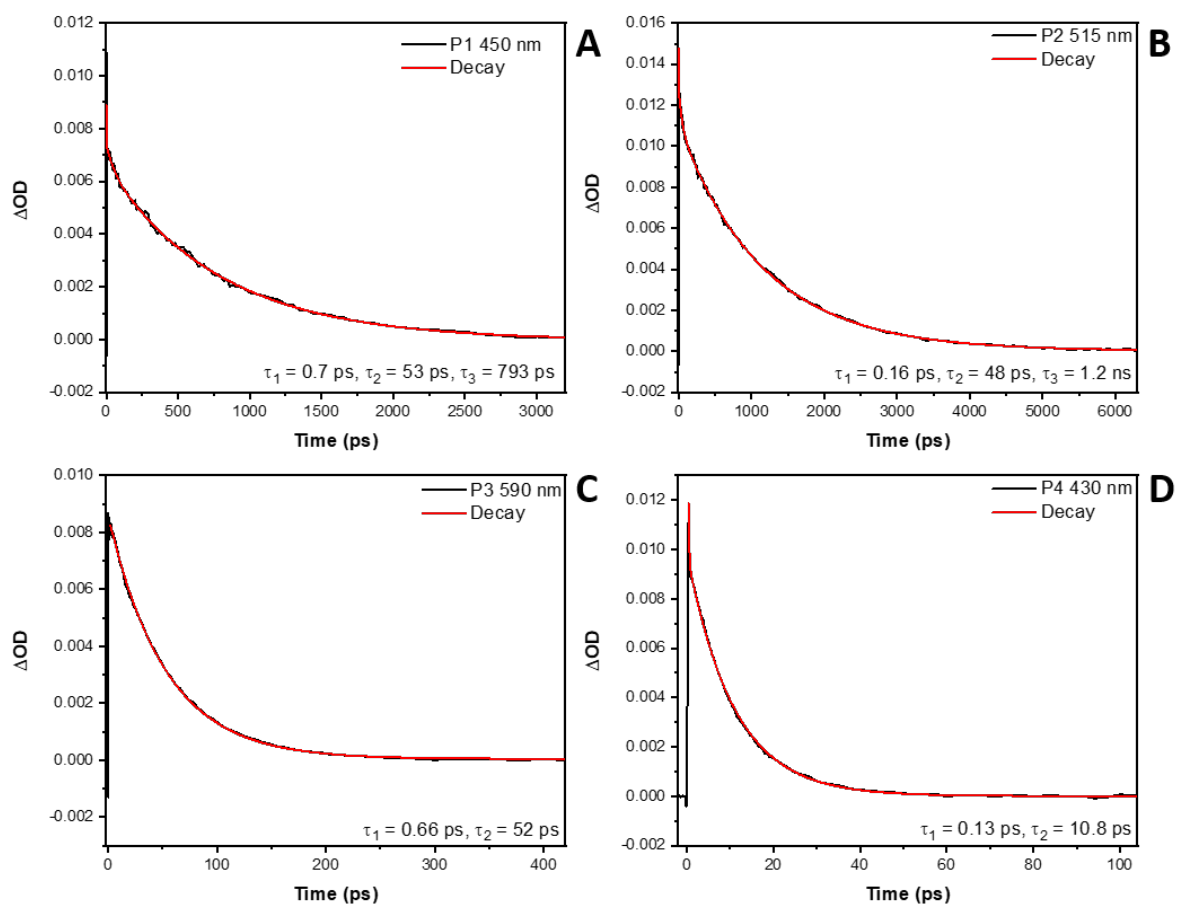

**Figure S49.** Ultrafast transient absorption kinetic data of **1-4** in THF (**1** (A), **2** (B), and **3** (C) following 495 nm excitation and **4** (D) following 650 nm excitation). Single wavelength kinetic analysis at specified wavelength.

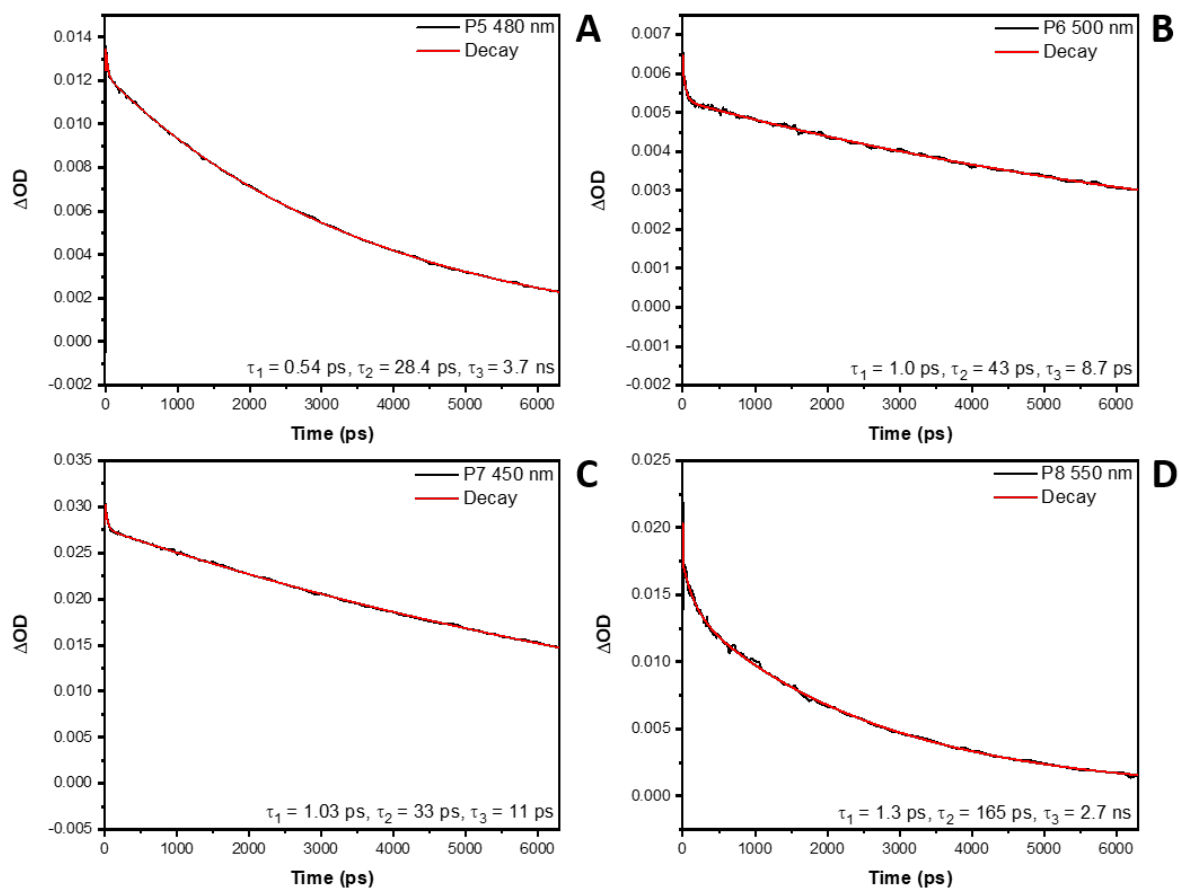

**Figure S50.** Ultrafast transient absorption kinetic data of **5-8** in THF (**5** (A), **6** (B), and **7** (C) following 400 nm excitation and **8** (D) following 495 nm excitation). Single wavelength kinetic analysis at specified wavelength.

**Table S3.** Absorbance and Emission Solvent Dependence Data for Chromophores **1-8**.

| molecule | solvents | $\Delta f$ | $\nu_A$<br>( $\text{cm}^{-1}$ ) | $\nu_F$<br>( $\text{cm}^{-1}$ ) | $\nu_A - \nu_F$<br>( $\text{cm}^{-1}$ ) | fitted slope <sup>[a]</sup><br>( $\text{cm}^{-1}$ ) | cavity volume <sup>[b]</sup><br>( $\times 10^{-22} \text{ cm}^3$ ) | $\mu_e - \mu_g$ <sup>[c]</sup><br>( $\text{D}$ ) |
|----------|----------|------------|---------------------------------|---------------------------------|-----------------------------------------|-----------------------------------------------------|--------------------------------------------------------------------|--------------------------------------------------|
| 1        | toluene  | 0.0132     | 22272                           | 16892                           | 5380                                    | 1270                                                | 3.46                                                               | 6.6                                              |
|          | dioxane  | 0.0246     | 22422                           | 16807                           | 5615                                    |                                                     |                                                                    |                                                  |
|          | EtOAc    | 0.1998     | 22523                           | 16807                           | 5716                                    |                                                     |                                                                    |                                                  |
|          | THF      | 0.2096     | 22422                           | 16722                           | 5700                                    |                                                     |                                                                    |                                                  |
|          | DCM      | 0.2172     | 22321                           | 16611                           | 5710                                    |                                                     |                                                                    |                                                  |
|          | DMSO     | 0.2635     | 22272                           | 16475                           | 5797                                    |                                                     |                                                                    |                                                  |
|          | ACN      | 0.3055     | 22523                           | 16639                           | 5884                                    |                                                     |                                                                    |                                                  |
| 2        | toluene  | 0.0132     | 22624                           | 17483                           | 5141                                    | 1694                                                | 4.09                                                               | 8.3                                              |
|          | dioxane  | 0.0246     | 22831                           | 17513                           | 5318                                    |                                                     |                                                                    |                                                  |
|          | EtOAc    | 0.1998     | 22883                           | 17513                           | 5370                                    |                                                     |                                                                    |                                                  |
|          | THF      | 0.2096     | 22831                           | 17422                           | 5409                                    |                                                     |                                                                    |                                                  |
|          | DCM      | 0.2172     | 22779                           | 17331                           | 5448                                    |                                                     |                                                                    |                                                  |
|          | DMSO     | 0.2635     | 22831                           | 17123                           | 5708                                    |                                                     |                                                                    |                                                  |
|          | ACN      | 0.3055     | 23042                           | 17271                           | 5771                                    |                                                     |                                                                    |                                                  |
| 3        | toluene  | 0.0132     | 20790                           | 15015                           | 5775                                    | 2030                                                | 4.05                                                               | 9.0                                              |
|          | dioxane  | 0.0246     | 21053                           | 15106                           | 5947                                    |                                                     |                                                                    |                                                  |
|          | EtOAc    | 0.1998     | 21186                           | 15038                           | 6148                                    |                                                     |                                                                    |                                                  |
|          | THF      | 0.2096     | 21097                           | 15015                           | 6082                                    |                                                     |                                                                    |                                                  |
|          | DCM      | 0.2172     | 21053                           | 15083                           | 5970                                    |                                                     |                                                                    |                                                  |
|          | DMSO     | 0.2635     | 21053                           | 14577                           | 6476                                    |                                                     |                                                                    |                                                  |
|          | ACN      | 0.3055     | 21322                           | 14815                           | 6507                                    |                                                     |                                                                    |                                                  |
| 4        | toluene  | 0.0132     | 17123                           | 13055                           | 4068                                    | 2612                                                | 4.82                                                               | 11.2                                             |
|          | dioxane  | 0.0246     | 17513                           | 13141                           | 4372                                    |                                                     |                                                                    |                                                  |
|          | EtOAc    | 0.1998     | 17637                           | 13055                           | 4582                                    |                                                     |                                                                    |                                                  |
|          | THF      | 0.2096     | 17544                           | 12987                           | 4557                                    |                                                     |                                                                    |                                                  |
|          | DCM      | 0.2172     | 17241                           | 12903                           | 4338                                    |                                                     |                                                                    |                                                  |
|          | DMSO     | 0.2635     | 17575                           | 12723                           | 4852                                    |                                                     |                                                                    |                                                  |
|          | ACN      | 0.3055     | 17825                           | 12674                           | 5151                                    |                                                     |                                                                    |                                                  |
| 5        | toluene  | 0.0132     | 29412                           | 19646                           | 9766                                    | 2214                                                | 2.86                                                               | 7.9                                              |
|          | dioxane  | 0.0246     | 29762                           | 19231                           | 10531                                   |                                                     |                                                                    |                                                  |
|          | EtOAc    | 0.1998     | 29851                           | 19417                           | 10434                                   |                                                     |                                                                    |                                                  |
|          | THF      | 0.2096     | 29762                           | 19268                           | 10494                                   |                                                     |                                                                    |                                                  |
|          | DCM      | 0.2172     | 29586                           | 19268                           | 10318                                   |                                                     |                                                                    |                                                  |
|          | DMSO     | 0.2635     | 29499                           | 18622                           | 10877                                   |                                                     |                                                                    |                                                  |
|          | ACN      | 0.3055     | 29762                           | 19011                           | 10751                                   |                                                     |                                                                    |                                                  |
| 6        | toluene  | 0.0132     | 26525                           | 20964                           | 5561                                    | 1569                                                | 3.52                                                               | 7.4                                              |
|          | dioxane  | 0.0246     | 26667                           | 20661                           | 6006                                    |                                                     |                                                                    |                                                  |
|          | EtOAc    | 0.1998     | 26596                           | 20747                           | 5849                                    |                                                     |                                                                    |                                                  |
|          | THF      | 0.2096     | 26525                           | 20576                           | 5949                                    |                                                     |                                                                    |                                                  |
|          | DCM      | 0.2172     | 26316                           | 20367                           | 5949                                    |                                                     |                                                                    |                                                  |
|          | DMSO     | 0.2635     | 26385                           | 20202                           | 6183                                    |                                                     |                                                                    |                                                  |
|          | ACN      | 0.3055     | 26525                           | 20202                           | 6323                                    |                                                     |                                                                    |                                                  |
| 7        | toluene  | 0.0132     | 25974                           | 20450                           | 5524                                    | 3134                                                | 3.44                                                               | 10.3                                             |
|          | dioxane  | 0.0246     | 26316                           | 20202                           | 6114                                    |                                                     |                                                                    |                                                  |
|          | EtOAc    | 0.1998     | 26385                           | 20202                           | 6183                                    |                                                     |                                                                    |                                                  |
|          | THF      | 0.2096     | 26316                           | 20243                           | 6073                                    |                                                     |                                                                    |                                                  |
|          | DCM      | 0.2172     | 26110                           | 20202                           | 5908                                    |                                                     |                                                                    |                                                  |
|          | DMSO     | 0.2635     | 26042                           | 19380                           | 6662                                    |                                                     |                                                                    |                                                  |
|          | ACN      | 0.3055     | 26318                           | 19380                           | 6938                                    |                                                     |                                                                    |                                                  |
| 8        | toluene  | 0.0132     | 22371                           | 17513                           | 4858                                    | 5793                                                | 4.25                                                               | 15.6                                             |
|          | dioxane  | 0.0246     | 22936                           | 17422                           | 5514                                    |                                                     |                                                                    |                                                  |
|          | EtOAc    | 0.1998     | 23202                           | 17182                           | 6020                                    |                                                     |                                                                    |                                                  |
|          | THF      | 0.2096     | 23148                           | 17036                           | 6112                                    |                                                     |                                                                    |                                                  |
|          | DCM      | 0.2172     | 22831                           | 17241                           | 5590                                    |                                                     |                                                                    |                                                  |
|          | DMSO     | 0.2635     | 23042                           | 15823                           | 7219                                    |                                                     |                                                                    |                                                  |
|          | ACN      | 0.3055     | 23310                           | 16584                           | 6726                                    |                                                     |                                                                    |                                                  |

[a] Fitted slopes obtained from linear regressions on plots in Figure 8. [b] Solvent cavity volumes were obtained from the ground state geometry optimization (M06-D3/Def2-TZVP) using the PCM solvation model.



**Cartesian coordinates of all ground state optimized structures:**

P1 Optimized Structure

|   |             |             |             |
|---|-------------|-------------|-------------|
| C | 2.27000700  | -2.51136300 | 0.00000200  |
| C | 1.38811000  | -1.45683000 | 0.00000100  |
| C | 1.87983500  | -0.12575600 | 0.00000000  |
| C | 3.27410900  | 0.11007400  | 0.00000100  |
| C | 4.14431800  | -1.00137900 | 0.00000200  |
| C | 3.65079100  | -2.27711700 | 0.00000200  |
| H | 1.87216200  | -3.51922000 | 0.00000200  |
| C | 0.98904500  | 0.97333100  | -0.00000100 |
| C | 3.73671700  | 1.44269300  | 0.00000000  |
| H | 5.21397000  | -0.82204900 | 0.00000200  |
| H | 4.33207800  | -3.11980700 | 0.00000300  |
| C | 2.84931300  | 2.48063500  | -0.00000100 |
| C | 1.46285800  | 2.26197900  | -0.00000100 |
| H | 4.80571200  | 1.62496600  | 0.00000100  |
| H | 3.21279200  | 3.50155100  | -0.00000100 |
| H | 0.77310900  | 3.09219300  | -0.00000200 |
| N | -0.37190800 | 0.63782200  | -0.00000200 |
| N | 0.01894400  | -1.70999800 | 0.00000000  |
| C | -0.76324400 | -0.70888500 | -0.00000100 |
| C | -1.48926800 | 1.48885400  | -0.00000400 |
| C | -4.00319800 | 0.90346000  | 0.00000000  |
| C | -4.90433800 | -0.15064300 | 0.00000200  |
| C | -4.46304400 | -1.47110300 | 0.00000200  |
| C | -3.11031900 | -1.77775800 | 0.00000000  |
| C | -2.21966800 | -0.72387400 | -0.00000100 |
| C | -2.65946100 | 0.59208000  | -0.00000100 |
| H | -4.33492500 | 1.93500500  | 0.00000000  |
| H | -5.96832700 | 0.05278900  | 0.00000200  |
| H | -5.19224900 | -2.27233700 | 0.00000300  |
| H | -2.76022400 | -2.80286100 | 0.00000100  |
| O | -1.45984300 | 2.69307600  | -0.00000200 |

## P2 Optimized Structure

|   |             |             |             |
|---|-------------|-------------|-------------|
| C | 3.01707200  | -2.65546500 | 0.00000100  |
| C | 2.26027900  | -1.50775800 | -0.00000100 |
| C | 2.90050000  | -0.24147600 | 0.00000000  |
| C | 4.31271600  | -0.16621800 | 0.00000300  |
| C | 5.05148900  | -1.36909200 | 0.00000500  |
| C | 4.41553900  | -2.58003300 | 0.00000400  |
| H | 2.50716100  | -3.61147100 | 0.00000000  |
| C | 2.14048900  | 0.95236800  | -0.00000200 |
| C | 4.92402500  | 1.10516500  | 0.00000400  |
| H | 6.13459700  | -1.31229700 | 0.00000700  |
| H | 4.99624800  | -3.49500000 | 0.00000500  |
| C | 4.16094600  | 2.23748900  | 0.00000200  |
| C | 2.75867800  | 2.17853300  | -0.00000100 |
| H | 6.00684100  | 1.16438500  | 0.00000600  |
| H | 4.63842100  | 3.21034900  | 0.00000200  |
| H | 2.16936900  | 3.08238900  | -0.00000300 |
| N | 0.74919900  | 0.77509700  | -0.00000500 |
| N | 0.87165200  | -1.60304400 | -0.00000400 |
| C | 0.20714900  | -0.51947800 | -0.00000500 |
| C | -0.25896100 | 1.75549600  | -0.00000900 |
| C | -2.80372000 | 1.47484600  | 0.00000000  |
| C | -3.86292300 | 0.54047100  | 0.00000100  |
| C | -3.57401200 | -0.85791000 | 0.00000000  |
| C | -2.23229700 | -1.30143200 | -0.00000300 |
| C | -1.24059700 | -0.36990400 | -0.00000500 |
| C | -1.52650400 | 1.00793600  | -0.00000400 |
| H | -3.01484000 | 2.53909100  | 0.00000100  |
| H | -2.01068300 | -2.36330400 | -0.00000400 |
| O | -0.08322100 | 2.94732900  | -0.00000300 |
| C | -5.20982000 | 0.95713800  | 0.00000500  |
| C | -4.64799500 | -1.77147100 | 0.00000200  |
| C | -6.22546400 | 0.04429500  | 0.00000700  |
| C | -5.94140100 | -1.33293500 | 0.00000500  |
| H | -5.42216800 | 2.02091400  | 0.00000600  |
| H | -7.25593400 | 0.37882700  | 0.00000900  |
| H | -6.75590800 | -2.04743500 | 0.00000600  |
| H | -4.42442100 | -2.83285300 | 0.00000100  |

### P3 Optimized Structure

|   |             |             |             |
|---|-------------|-------------|-------------|
| C | -3.01168100 | 2.41457000  | 0.42945400  |
| C | -2.09812600 | 1.40945800  | 0.21158600  |
| C | -2.53731000 | 0.08247500  | 0.00742500  |
| C | -3.92409400 | -0.19432300 | -0.05404000 |
| C | -4.83224200 | 0.86131700  | 0.18007600  |
| C | -4.38255800 | 2.12901700  | 0.42970400  |
| H | -2.64758100 | 3.42424500  | 0.57816700  |
| C | -1.59168000 | -0.94861900 | -0.17936900 |
| C | -4.33696000 | -1.50380100 | -0.36434400 |
| H | -5.89486300 | 0.64690900  | 0.14541300  |
| H | -5.09234800 | 2.92897200  | 0.60542800  |
| C | -3.40386700 | -2.46642700 | -0.62152600 |
| C | -2.02889300 | -2.20467900 | -0.53016500 |
| H | -5.39748700 | -1.72565500 | -0.41096300 |
| H | -3.71897000 | -3.46825300 | -0.88913000 |
| H | -1.32981900 | -3.00220700 | -0.71586600 |
| N | -0.21476500 | -0.60029300 | -0.01953700 |
| N | -0.75430200 | 1.70484800  | 0.12540500  |
| C | 0.11196000  | 0.77386600  | 0.00320700  |
| C | 0.74373200  | -1.59405200 | 0.27487300  |
| O | 0.41917300  | -2.72452400 | 0.55288200  |
| C | 3.24278000  | 2.80681100  | -0.41577600 |
| C | 4.22066900  | 1.85453900  | -0.31365100 |
| C | 3.88275500  | 0.50425900  | -0.10487300 |
| C | 2.51449700  | 0.15080400  | -0.01501300 |
| C | 1.52323000  | 1.14294900  | -0.11475200 |
| C | 1.89356000  | 2.45403400  | -0.31105000 |
| H | 5.90015500  | -0.23829500 | -0.04225300 |
| H | 3.50907000  | 3.84416400  | -0.57736700 |
| H | 5.26835000  | 2.12527600  | -0.38828100 |
| C | 4.85226500  | -0.50973100 | 0.02933800  |
| C | 2.15642500  | -1.19037500 | 0.20665500  |
| H | 1.12109300  | 3.20857700  | -0.38583300 |
| C | 3.12946800  | -2.15103900 | 0.34254300  |
| C | 4.48351900  | -1.80828800 | 0.25108000  |
| H | 2.83002700  | -3.17756700 | 0.51326400  |
| H | 5.23775100  | -2.57843600 | 0.35500500  |

## P4 Optimized Structure

|   |             |             |             |
|---|-------------|-------------|-------------|
| C | -4.12873400 | -2.60602200 | -0.44403000 |
| C | -3.32856300 | -1.50799900 | -0.22842000 |
| C | -3.90315700 | -0.23924100 | 0.00578600  |
| C | -5.31013800 | -0.11809400 | 0.09357600  |
| C | -6.10053500 | -1.26457700 | -0.14051100 |
| C | -5.52181800 | -2.47335700 | -0.41590200 |
| H | -3.65769300 | -3.56657800 | -0.61506200 |
| C | -3.07387100 | 0.88692000  | 0.19561000  |
| C | -5.86063800 | 1.13309500  | 0.42842900  |
| H | -7.17937800 | -1.16786100 | -0.08534800 |
| H | -6.14358000 | -3.34338900 | -0.59048900 |
| C | -5.03583600 | 2.19022500  | 0.68304200  |
| C | -3.64200600 | 2.08306800  | 0.56772400  |
| H | -6.93811400 | 1.23505700  | 0.49461600  |
| H | -5.45471500 | 3.14812100  | 0.96782000  |
| H | -3.03320700 | 2.95111100  | 0.75363100  |
| N | -1.66695900 | 0.69288700  | 0.01435500  |
| N | -1.96008900 | -1.65515500 | -0.17498500 |
| C | -1.19851200 | -0.63941900 | -0.04864600 |
| C | -0.82307000 | 1.78826700  | -0.24743100 |
| O | -1.25560800 | 2.89356400  | -0.46887400 |
| C | 2.13418800  | -2.34801600 | 0.22108000  |
| C | 3.01158400  | -1.29145000 | 0.13774400  |
| C | 2.51679200  | 0.01334200  | -0.00830800 |
| C | 1.12357000  | 0.22620300  | -0.05695600 |
| C | 0.24566900  | -0.86686800 | 0.02469000  |
| C | 0.75779500  | -2.13975300 | 0.16017400  |
| H | 2.53143800  | -3.34911500 | 0.33396300  |
| C | 3.38505400  | 1.11261300  | -0.11606600 |
| C | 0.62946400  | 1.52945300  | -0.21765600 |
| H | 0.07356300  | -2.97544000 | 0.22137800  |
| C | 1.49923500  | 2.58884500  | -0.33156700 |
| C | 2.87836500  | 2.37923000  | -0.27772300 |
| H | 1.09771500  | 3.58617600  | -0.45604000 |
| H | 3.56587300  | 3.21165800  | -0.36161300 |
| C | 4.84350700  | 0.90227000  | -0.06059700 |
| C | 4.46425200  | -1.53343200 | 0.19709500  |
| N | 5.28498600  | -0.40831100 | 0.09228900  |
| O | 5.63951100  | 1.81048200  | -0.14146700 |
| O | 4.93171600  | -2.64139000 | 0.32906300  |
| C | 6.72820600  | -0.59262000 | 0.14447400  |
| H | 7.18559800  | -0.21707600 | -0.77008700 |
| H | 6.93171700  | -1.65220400 | 0.25410200  |
| H | 7.14543700  | -0.04375500 | 0.98806700  |

## P5 Optimized Structure

|   |             |             |             |
|---|-------------|-------------|-------------|
| N | -0.32865500 | 0.48137900  | -0.00000100 |
| N | -0.73219300 | -1.72866800 | 0.00000000  |
| C | 0.17326100  | -0.81149100 | -0.00000100 |
| C | 0.68576300  | 1.45054700  | 0.00000300  |
| O | 0.52862700  | 2.63836200  | 0.00000200  |
| C | -3.23508600 | -1.50313600 | -0.00000100 |
| C | -4.26871100 | -0.58145500 | -0.00000100 |
| C | -1.93701700 | -1.02065300 | -0.00000100 |
| C | -4.02071000 | 0.79057000  | -0.00000100 |
| C | -1.70700400 | 0.36964500  | -0.00000100 |
| C | -2.72938300 | 1.29535600  | -0.00000100 |
| C | 2.61925400  | -1.66962700 | 0.00000000  |
| C | 3.93841200  | -1.22790700 | 0.00000000  |
| C | 1.62525500  | -0.71659800 | 0.00000000  |
| C | 4.24763800  | 0.12482800  | 0.00000000  |
| C | 1.93814300  | 0.64664400  | 0.00000100  |
| C | 3.24143600  | 1.08472100  | 0.00000100  |
| H | 3.46900900  | 2.14430100  | 0.00000200  |
| H | 2.38112900  | -2.72621100 | -0.00000100 |
| H | 4.74159500  | -1.95498400 | 0.00000000  |
| H | 5.28542300  | 0.43459300  | 0.00000100  |
| H | -3.42560900 | -2.56953500 | 0.00000000  |
| H | -5.29395400 | -0.93172400 | -0.00000100 |
| H | -4.85678300 | 1.47960500  | -0.00000100 |
| H | -2.53140300 | 2.35941100  | -0.00000200 |

## P6 Optimized Structure

|   |             |             |             |
|---|-------------|-------------|-------------|
| N | 1.49635300  | 0.53295300  | 0.00000100  |
| N | 1.71308400  | -1.70465200 | 0.00000000  |
| C | 0.88597000  | -0.71468700 | 0.00000000  |
| C | 0.57436600  | 1.59121000  | 0.00000400  |
| O | 0.84296800  | 2.75987600  | 0.00000200  |
| C | 4.22448900  | -1.69038600 | -0.00000100 |
| C | 5.33163700  | -0.85960300 | -0.00000100 |
| C | 2.97088100  | -1.10029800 | 0.00000000  |
| C | 5.20106400  | 0.52914700  | -0.00000100 |
| C | 2.85953200  | 0.30479700  | 0.00000000  |
| C | 3.95756700  | 1.14094000  | -0.00000100 |
| C | -1.60506000 | -1.35496800 | 0.00000000  |
| C | -2.91652800 | -0.81842200 | 0.00000000  |
| C | -0.54918500 | -0.50089600 | 0.00000100  |
| C | -4.04847600 | -1.65518200 | -0.00000100 |
| C | -3.10902200 | 0.59405800  | 0.00000000  |
| C | -0.74293700 | 0.90646000  | 0.00000100  |
| C | -5.31040100 | -1.12793200 | -0.00000100 |
| H | -3.89920100 | -2.72953900 | -0.00000100 |
| C | -4.42091600 | 1.10390000  | -0.00000100 |
| C | -1.98378900 | 1.45390200  | 0.00000000  |
| C | -5.49934100 | 0.26317700  | -0.00000100 |
| H | -6.17156200 | -1.78548800 | -0.00000100 |
| H | -4.55871400 | 2.17984700  | -0.00000100 |
| H | -2.12270300 | 2.53018400  | 0.00000000  |
| H | -6.50397800 | 0.66853600  | -0.00000100 |
| H | -1.46396700 | -2.43031800 | 0.00000000  |
| H | 3.85063100  | 2.21790400  | -0.00000100 |
| H | 6.09255200  | 1.14476900  | -0.00000200 |
| H | 6.32368600  | -1.29522200 | -0.00000100 |
| H | 4.32435200  | -2.76908900 | 0.00000000  |

## P7 Optimized Structure

|   |             |             |             |
|---|-------------|-------------|-------------|
| N | 0.90166800  | -0.40641000 | 0.00000000  |
| N | 1.43542800  | 1.77494800  | 0.00000000  |
| C | 0.46218400  | 0.91722500  | 0.00000000  |
| C | 0.08684100  | -1.54039800 | 0.00000100  |
| O | 0.56703500  | -2.64858600 | -0.00000100 |
| C | -2.83155200 | 2.69422800  | 0.00000100  |
| C | -3.70455700 | 1.64044500  | 0.00000000  |
| C | -3.23220200 | 0.31239400  | 0.00000000  |
| C | -1.83607800 | 0.08000300  | 0.00000000  |
| C | -0.95477100 | 1.18501700  | 0.00000100  |
| C | -1.45127300 | 2.46740000  | 0.00000100  |
| H | -3.20534800 | 3.71059100  | 0.00000100  |
| C | -4.10571000 | -0.79352100 | 0.00000000  |
| C | -1.35711400 | -1.25098600 | 0.00000000  |
| H | -0.75571600 | 3.29803000  | 0.00000100  |
| C | -2.24279000 | -2.30204100 | 0.00000000  |
| C | -3.62277000 | -2.07361000 | 0.00000000  |
| H | -1.85042600 | -3.31194300 | 0.00000000  |
| H | -4.30514000 | -2.91432200 | -0.00000100 |
| C | 3.91436000  | 1.44427500  | 0.00000000  |
| C | 2.59283800  | 1.01932300  | 0.00000000  |
| C | 2.29310700  | -0.35042000 | 0.00000000  |
| C | 3.27577200  | -1.32472200 | 0.00000000  |
| C | 4.58782000  | -0.88148400 | -0.00000100 |
| C | 4.90254400  | 0.47859000  | -0.00000100 |
| H | 4.15036100  | 2.50162800  | 0.00000000  |
| H | 3.02778100  | -2.37640200 | 0.00000000  |
| H | 5.38955200  | -1.61033500 | -0.00000100 |
| H | 5.94352900  | 0.77965000  | -0.00000100 |
| H | -5.17462900 | -0.60849200 | 0.00000000  |
| H | -4.77580800 | 1.81018900  | 0.00000000  |

## P8 Optimized Structure

|   |             |             |             |
|---|-------------|-------------|-------------|
| N | -2.37171500 | 0.41423700  | 0.00000600  |
| N | -2.73660000 | -1.80118100 | -0.00000500 |
| C | -1.83294000 | -0.87251300 | 0.00000000  |
| C | -1.64744500 | 1.60543700  | 0.00001900  |
| O | -2.20009800 | 2.67642200  | 0.00003600  |
| C | 1.58620800  | -2.38970000 | 0.00000700  |
| C | 2.38264800  | -1.26889600 | 0.00000500  |
| C | 1.79727900  | 0.00963400  | 0.00000200  |
| C | 0.39319600  | 0.13488000  | 0.00000500  |
| C | -0.39990900 | -1.03454700 | 0.00000200  |
| C | 0.19667600  | -2.27532600 | 0.00000300  |
| H | 2.05705600  | -3.36473600 | 0.00001200  |
| C | 2.59538300  | 1.16684900  | -0.00000200 |
| C | -0.18004800 | 1.42502400  | 0.00001400  |
| H | -0.42807700 | -3.15980400 | 0.00000200  |
| C | 0.62462600  | 2.53918600  | 0.00001700  |
| C | 2.01452100  | 2.41100900  | 0.00000600  |
| H | 0.16144800  | 3.51800300  | 0.00002600  |
| H | 2.65050200  | 3.28725200  | 0.00000400  |
| C | 4.06738900  | 1.04702600  | -0.00002200 |
| C | 3.84997300  | -1.41846000 | 0.00001300  |
| N | 4.59577600  | -0.23806800 | -0.00001300 |
| O | 4.79885500  | 2.01068200  | -0.00004200 |
| O | 4.38921900  | -2.50088300 | 0.00004100  |
| C | 6.04886100  | -0.33154300 | -0.00002200 |
| H | 6.45457700  | 0.15962900  | -0.88369200 |
| H | 6.32166700  | -1.38113100 | -0.00002400 |
| C | -5.23382400 | -1.66314100 | -0.00001700 |
| C | -3.94877300 | -1.13737300 | -0.00000700 |
| C | -3.75428100 | 0.25137700  | -0.00000100 |
| C | -4.80706300 | 1.14867000  | -0.00000500 |
| C | -6.08039300 | 0.60545700  | -0.00001400 |
| C | -6.29141100 | -0.77502900 | -0.00002100 |
| H | -5.38844500 | -2.73521800 | -0.00002200 |
| H | -4.64114000 | 2.21606900  | 0.00000100  |
| H | -6.93552700 | 1.27071100  | -0.00001700 |
| H | -7.30671900 | -1.15320300 | -0.00002800 |
| H | 6.45459100  | 0.15962900  | 0.88364200  |
